## When parasites are selected to kill the young

Ryosuke Iritani<sup>\*,1-4</sup>, Elisa Visher<sup>2,5</sup> & Mike Boots<sup>2,6,7</sup>

June 25, 2018

Author for correspondence: RI, E-mail: Lambtani@gmail.com; tel: +1 (510) 642-3281; fax: +1 (510) 643-6264

Contact information:

1. Biosciences, College of Life and Environmental Science, University of Exeter, Exeter, United Kingdom.
2. Department of Integrative Biology, University of California, Berkeley, 3040 Valley Life Sciences Building #3140, Berkeley, CA 94720-3140.
3. ORCID: 0000-0002-2396-1109
4. E-mail: Lambtani@gmail.com
5. E-mail: elisa\_visher@berkeley.edu
6. ORCID: 0000-0003-3763-6136
7. E-mail: mboots@berkeley.edu

Author contribution: R.I and M.B. designed the research; R.I. carried out model analyses and wrote the initial draft; all authors contributed to the revision.

Conflict of interest: None.

Data accessibility: No data is used for this study; we submitted the detailed mathematical analyses as a supplementary material.

Number of words in abstract: 150

Number of words in main text: 3600

Number of graphic figures: 3

Number of papers cited: 97

Running title: Evolution of stage-specific virulence

Key words: Parasite virulence; Adaptive dynamics; Life-history evolution; Age-structured population; Senescence

Article type: Letter

## Abstract

1           The impact of infectious disease is often very different in juveniles and adults, but theory  
2 has focused on the drivers of stage-dependent defense in hosts rather than stage-dependent  
3 virulence evolution. We develop a stage-structured (juvenile-adult) epidemiological model  
4 and examine the evolutionary outcomes of stage-specific virulence under the classic  
5 assumption of a transmission-virulence trade-off. We show that selection on virulence  
6 against adults remains consistent with the classic theory. However, the evolution of juvenile  
7 virulence is sensitive to both demography and contact structure with higher virulence  
8 against juveniles being favored either when the contact structure is assortative (juveniles  
9 preferentially interact together) and the juvenile stage is short, or in contrast when the  
10 contact structure is disassortative and the juvenile stage is long. These results highlight  
11 the potentially profound effects of host stage-structure on determining parasite virulence  
12 in nature. This new perspective may have broad implications for both understanding and  
13 managing disease severity.

## 14 Introduction

15 Understanding how parasites are selected to exploit their hosts remains a central research  
16 question in the evolutionary ecology of host-parasite interactions (Smith 1904; Ball 1943;  
17 Anderson & May 1982; Read 1994; Ebert & Herre 1996; Frank 1996; Mideo *et al.* 2008; Alizon  
18 *et al.* 2009; Schmid-Hempel 2011; Bull & Lauring 2014; Cressler *et al.* 2016), with important  
19 implications for host persistence (Boots & Sasaki 2003; De Castro & Bolker 2005), disease  
20 management (Dieckmann 2005), and host-parasite coevolution (Boots *et al.* 2009). Theory  
21 on parasite evolution is typically based on trade-offs imposed between transmission rate and  
22 virulence (defined in this literature as the increased death rate due to infection; Anderson & May  
23 1982; Ewald 1983). Specifically, the transmission-virulence trade-off hypothesis posits that high  
24 host exploitation by the parasite leads to high transmission but also results in higher virulence  
25 (reviewed in Ewald 1983; Alizon *et al.* 2009). Theoretically, evolutionarily stable exploitation  
26 occurs when the marginal increase in transmission due to exploitation equals the marginal  
27 increase in host mortality due to exploitation. This consequently optimizes parasite fitness (e.g.,  
28 Charnov 1976; Anderson & May 1982; Bulmer 1994; Otto & Day 2007; but see Lion & Metz 2018).  
29 Another, less studied trade-off is between virulence and rate of recovery, with more rapidly  
30 growing parasites being harder to clear but causing more damage (Anderson & May 1982).  
31 Such trade-offs are fundamental to understanding the evolutionary drivers of the virulence  
32 of infectious diseases and offer a number of important insights for disease management  
33 (Van Baalen & Sabelis 1995). However, despite the considerable variation in virulence that

34 is found at different life-stages in nature (Hudson & Dobson 1995), the implications of host  
35 stage structure to parasite virulence has not been examined and the differences in virulence  
36 between adults and juveniles are typically explained in terms of differences in host defense  
37 (Hudson & Dobson 1995; Wilson *et al.* 2002).

38 A number of recent ecological studies have examined the impact of a host populations'  
39 stage-related heterogeneities in disease response on disease epidemiology (e.g., Dwyer 1991;  
40 Fleming-Davies *et al.* 2015; Hite *et al.* 2016). In these studies, the differences in the impact  
41 of infection between life stages have been assumed to be properties of the host and driven  
42 by processes like maternal and acquired immunity and age-related variation in tolerance,  
43 resistance, exposure, immunocompetence, and susceptibility (Hudson & Dobson 1995; Wilson  
44 *et al.* 2002). In principle, however, this variation in disease outcomes across different host  
45 life-stages (e.g., egg, larvae, juvenile, adult, etc) has the potential to significantly impact the  
46 evolutionary dynamics of virulence. Additionally, stage structure in host populations can  
47 also lead to variation in transmission routes between and across stages (reviewed in Craft  
48 2015; VanderWaal & Ezenwa 2016; White *et al.* 2017). For instance, juvenile-juvenile and  
49 adult-adult contacts might be more likely than juvenile-adult contacts if juvenile and adult hosts  
50 are segregated in spatio-temporal niches, typical of humans (Rohani *et al.* 2010), amphibians  
51 (Kilpatrick *et al.* 2010), and insects (Briggs & Godfray 1995). Such variation in assortativity  
52 or disassortivity of transmission between life stages can create differential selection pressures  
53 where a parasite may be selected to bias its virulence towards different stages ("stage-specific  
54 virulence"). We propose that the differences in virulence at different ages may not necessarily

55 be properties of the host, but instead could be selected for as adaptive properties of the parasites  
56 (Fig 1).

57 Here, we show that hosts' stage-related contact structure and the period of reproductive  
58 (and thus adult) stage can in concert drive the evolution of stage-specific virulence. We develop  
59 a mathematical model and explore the evolutionary outcomes of stage-specific virulence  
60 under different patterns of contacts across stages. We explicitly model the stage-structured  
61 host population dynamics for juveniles and adults including epidemiology, and analyze the  
62 evolutionary dynamics using the adaptive dynamics toolbox (Hofbauer & Sigmund 1990;  
63 Dieckmann & Law 1996). We first show that the evolutionary outcomes of virulence against  
64 adults ("adult-virulence") follow classic results such that background mortality rate in adults  
65 favors higher virulence. Second, we show that the evolutionary outcomes of virulence against  
66 juveniles ("juvenile-virulence") are critically impacted by the interplay between assortativity  
67 and maturation. We explain the results in terms of Fisher's reproductive value to account for  
68 life-history evolution of parasites (Fisher 1958; Taylor 1990; Frank 1998; Caswell 2001; Gandon  
69 2004; Grafen 2006; Otto & Day 2007; Williams 2011; Williams & Kamel 2018; Lion 2018) and in  
70 terms of transmission pathways (and thus the pathways to reproductive success of parasites).  
71 We find a number of robust examples in the empirical literature that match our predictions and  
72 therefore highlight the importance of age-structure to the evolution of infectious disease.

## 73 Method

74 We consider a host population subdivided into juvenile (J) and adult (A) stages, in which  
75 juveniles are obviously incapable of reproduction. The density of susceptible or infected  
76 juveniles is denoted  $S_J$  or  $I_J$  respectively, and that of susceptible or infected adults is denoted  
77  $S_A$  or  $I_A$  respectively. Combining an epidemiological SI-model with a stage-structured model  
78 (Schreiber & Rudolf 2008) yields the following ordinary differential equations (ODEs; Appendix  
79 A1):

$$\begin{aligned}\frac{dS_J}{dt} &= (r - \kappa(S_A + I_A)) \cdot (S_A + I_A) - (u + \phi_{JA} + \phi_{JJ} + m_J) S_J, \\ \frac{dS_A}{dt} &= uS_J - (m_A + \phi_{AJ} + \phi_{AA}) S_A \\ \frac{dI_J}{dt} &= (\phi_{JJ} + \phi_{JA}) S_J - (u + m_J + v_J) I_J \\ \frac{dI_A}{dt} &= (\phi_{AJ} + \phi_{AA}) S_A + uI_J - (m_A + v_A) I_A,\end{aligned}\tag{1}$$

80 where:  $r$  represents an intrinsic growth rate of the adult hosts per capita, and we assume that  
81 susceptible and infected hosts have the same fecundity; there is no reproduction from juveniles.  
82 Reproduction is reduced by a density-dependent factor  $\kappa$ ; juveniles mature at a rate  $u$ ;  $\phi_{XY}$   
83 represents the rate at which a susceptible stage-X host gets transmitted from an infected stage-Y  
84 host (i.e., force of infection from infectious Y to susceptible X per capita; Fig 2);  $m_X$  represents  
85 the background mortality for a stage-X host;  $v_X$  represents the virulence against a stage-X host,  
86 as an evolving trait. Note that we choose to consider discrete stages rather than continuous  
87 stages. For other approaches including physiologically structured population modeling and

88 infection-age modeling frameworks, see Roos & Persson 2013; Day *et al.* 2011; Mideo *et al.* 2011.  
89 Our methodology here allows to evaluate the relative strength of exploitation against juveniles  
90 compared to adults.

91 Maturation and natural death rates can both affect the relative length of a adult-stage of the  
92 hosts. To quantify this, we define the expected fraction of time a host individual spends as an  
93 adult in the entire lifespan in the absence of disease by  $\theta_A$ . In Appendix A2, we showed that  
94  $\theta_A$  is given by:

$$\theta_A = \frac{u}{u + m_J - m_A} \left( 1 + \frac{m_A}{u + m_J - m_A} \cdot \ln \left( \frac{m_A}{u + m_J} \right) \right). \quad (2)$$

95 We use  $\theta_A$  as a characteristic parameter of the stage-structured host populations.

96 The force of infection for a stage-X host from a stage-Y host (where X and Y run across J and  
97 A) involves with three processes: susceptibility  $\alpha_X$  (the rate at which a stage-X host becomes  
98 infected given exposure to infectious propagules), contact structure  $\sigma_{XY}$  (which represents the  
99 intensity of interaction between a stage-Y host and a stage-X host), and infectiousness  $\beta_Y$  (the  
100 rate of propagule production from a stage-Y host; reviewed in VanderWaal & Ezenwa 2016):

$$\begin{aligned} \phi_{JJ} &= \frac{\alpha_J \sigma_{JJ} \beta_J I_J}{S_J + S_A + I_J + I_A}, \\ \phi_{JA} &= \frac{\alpha_J \sigma_{JA} \beta_A I_A}{S_J + S_A + I_J + I_A}, \\ \phi_{AJ} &= \frac{\alpha_A \sigma_{AJ} \beta_J I_J}{S_J + S_A + I_J + I_A}, \\ \phi_{AA} &= \frac{\alpha_A \sigma_{AA} \beta_A I_A}{S_J + S_A + I_J + I_A} \end{aligned} \quad (3)$$

101 (see Fig 2). Here, Eqn (3) assumes that the transmission follows a frequency-dependent  
102 mass-action model (McCallum *et al.* 2001). To quantify the contact structure, we use a single  
103 parameter of contact structure  $\sigma = 1 - \sigma_{AJ} = \sigma_{JJ} = 1 - \sigma_{JA} = \sigma_{AA}$ , accounting for the assumption  
104 that within-class contacts decrease linearly with between-class contacts (and vice versa; but see  
105 Rohani *et al.* 2010; Glasser *et al.* 2012; Craft 2015). With this symmetry, “assortativity” is given  
106 by:

$$\rho = \sigma_{JJ} + \sigma_{AA} - 1 = 2\sigma - 1, \quad (4)$$

107 where  $\rho$  varies from  $-1$  to  $1$  (Massol & Cheptou 2011; Rodrigues & Gardner 2012; Massol &  
108 Débarre 2015; Iritani & Cheptou 2017). If  $-1 \leq \rho < 0$ , then within-stage contact is less frequent  
109 compared to between-stage contact (such a contact is said to be “disassortative”). Instead, if  
110  $0 < \rho \leq 1$ , then within-stage contact is more likely than between-stage contact (“assortative”  
111 contact).  $\rho = 0$  indicates that contact is unbiased (“random” contact). In the extreme case,  $\rho = 1$   
112 (or  $-1$ ) indicates that contact (and consequently transmission) occurs exclusively within stages.

113 A final ingredient is the transmission-virulence trade-off, formulated by:

$$\begin{aligned} \beta_J &= b_J \frac{k_J v_J}{1 + k_J v_J}, \\ \beta_A &= b_A \frac{k_A v_A}{1 + k_A v_A}, \end{aligned} \quad (5)$$

114 where  $k_X$  tunes the degree of steepness or the efficiency of virulence for infectiousness from  
115 stage- $X$  hosts;  $b_X$  represent the upper bounds of infectiousness from stage- $X$  hosts. Here, we  
116 have assumed that infectiousness increases with virulence; hence, the trade-off is explicitly



117 imposed between infectiousness and virulence.

118 We use the adaptive dynamics toolbox (Hofbauer & Sigmund 1990; Dieckmann & Law  
 119 1996) to study the long-term evolutionary dynamics. First, suppose that the demographic and  
 120 epidemiological dynamics have quickly reached a steady state:  $(S_J, S_A, I_J, I_A) = (S_J^*, S_A^*, I_J^*, I_A^*)$ ,  
 121 which is a solution of the ODEs for a given value of  $(v_J, v_A)$ . We then introduce a rare mutant  
 122 of small phenotypic changes in host stage-specific virulence,  $\mathbf{v}' := (v'_J, v'_A)$  attempting to invade  
 123 a monomorphic, resident type (“wild type”) virulence  $\mathbf{v} := (v_J, v_A)$ . We assume that the  
 124 differences in virulence between mutant and wild types are very small (phenotypically weak  
 125 selection). We detailed the outline of the analysis in Appendix A3.

126 To assess the possibility of mutant invasion, we define the invasion fitness, denoted  $w$ , by  
 127 using the Next-Generation Theorem (Driessche & Watmough 2002; Hurford *et al.* 2010). The  
 128 “next-generation matrix” (that governs the population dynamics of the rare mutant and thus  
 129 its long term growth) can be written as the product of five matrices, given by:

$$\mathbf{G}' = \underbrace{\begin{pmatrix} S_J^* & 0 \\ 0 & S_A^* \end{pmatrix}}_{\text{availability}} \underbrace{\begin{pmatrix} \alpha_J & 0 \\ 0 & \alpha_A \end{pmatrix}}_{\text{susceptibility}} \underbrace{\begin{pmatrix} \sigma_{JJ} & \sigma_{JA} \\ \sigma_{AJ} & \sigma_{AA} \end{pmatrix}}_{\text{contact}} \underbrace{\begin{pmatrix} \frac{\beta'_J}{H^*} & 0 \\ 0 & \frac{\beta'_A}{H^*} \end{pmatrix}}_{\text{infectiousness}} \underbrace{\begin{pmatrix} \frac{1}{\mu'_J} & 0 \\ \frac{u}{\mu'_J \mu'_A} & \frac{1}{\mu'_A} \end{pmatrix}}_{\text{infectious period}} \quad (6)$$

130 (see Appendix), where  $H^* = S_J^* + S_A^* + I_J^* + I_A^*$  (the total density of the hosts),  $\mu'_J = u + m_J + v'_J$   
 131 (the loss rate of infected juveniles with maturation being included), and  $\mu'_A = m_A + v'_A$  (the  
 132 mortality rate of infected adults). The decomposition of  $\mathbf{G}'$  into the product of matrices allows

133 for a natural interpretation by partitioning the epidemiological process and is consistent with  
 134 the proposed approach to transmission dynamics in heterogeneous host populations (reviewed  
 135 in Craft 2015; VanderWaal & Ezenwa 2016; White *et al.* 2017). The first matrix restores the  
 136 availability of susceptible hosts, each with a specific susceptibility (the second matrix); the  
 137 third matrix represents the contact pattern with infected hosts; the fourth matrix represents the  
 138 infectiousness of infected hosts per capita, and parasites impact the infectious period among  
 139 hosts with the effect of maturation from juveniles to adults being included (the fifth matrix).

140 The invasion fitness is given by the dominant eigenvalue of  $\mathbf{G}'$  (denoted  $\Lambda[\mathbf{G}']$ ), which turns  
 141 out to exhibit a complicated expression; therefore, we choose to use a simpler but equivalent  
 142 measure for invasion fitness, which reads:

$$w(\mathbf{v}', \mathbf{v}) = \alpha_J \frac{S_J^*}{H^*} \sigma_{JJ} \frac{\beta'_J}{\mu'_J} + \frac{u}{\mu'_J} \cdot \alpha_J \frac{S_J^*}{H^*} \sigma_{JA} \frac{\beta'_A}{\mu'_A} + \alpha_A \frac{S_A^*}{H^*} \sigma_{AA} \frac{\beta'_A}{\mu'_A} - \alpha_J \alpha_A \frac{\rho S_J^* S_A^*}{(H^*)^2} \cdot \frac{\beta'_J \beta'_A}{\mu'_J \mu'_A} \quad (7)$$

143 (also see Gandon 2004; Camino Beck & Lewis 2007; Camino Beck & Lewis 2008; Camino Beck  
 144 *et al.* 2008; Hurford *et al.* 2010; Best *et al.* 2014; Iritani & Cheptou 2017). The condition for the  
 145 mutant type to outcompete the wild type (i.e., invadability condition),  $w(\mathbf{v}', \mathbf{v}) > 1$ , holds if and  
 146 only if  $\Lambda[\mathbf{G}'] > 1$  (for more details, see Appendix A4).

147 Virulence evolves in the direction of selection gradient, given by:

$$g_J(\mathbf{v}) = \frac{\partial w(\mathbf{v}', \mathbf{v})}{\partial v'_J},$$

$$g_A(\mathbf{v}) = \frac{\partial w(\mathbf{v}', \mathbf{v})}{\partial v'_A}, \quad (8)$$

148 where the partial derivatives are evaluated at  $\mathbf{v}' = \mathbf{v}$  ("neutrality"). Evolution ceases at which  
149 both gradients are nullified ("Singular Strategy", SS).

150 We assess two stability criteria of the singular strategy. The first criterion, attainability  
151 (Takada & Kigami 1991; Christiansen 1991), concerns whether recurrent substitutions of genes  
152 from wild to mutant can lead to the convergence of the strategy to SS. The second is referred to  
153 as evolutionary stability (Maynard Smith & Price 1973), which assures that SS can resist against  
154 any invasion of alternative, mutant strategies. If SS meets both of these criteria, it is then called  
155 as Continuously Stable Strategy (CSS Eshel 1983). Analytical investigation revealed that the  
156 SS is always a CSS, and thus we do not detail the stability analyses below. We will hereafter  
157 superscriptize an asterisk (\*) on CSS.

158 We use the following default parameter-values:  $r = 6$ ,  $\kappa = 0.06$ ,  $h = 0$ ,  $m_J = 1$ ,  $\alpha_J = \alpha_A =$   
159  $1$ ,  $k_J = k_A = 1$ ,  $b_J = b_A = 10$ , while varying  $u$  and  $\rho$ . That is, the parameter values are symmetric  
160 for juveniles and adults. We subsequently check the effects of the difference in  $\alpha$  (susceptibility),  
161  $k$  (efficiency of exploitation for transmission), and  $b$  (upper bound in infectiousness). Finally,  
162 we check whether recovery or tolerance in the host can affect the results.

## 163 Results

164 We first derive the selection gradient along  $v_A$ :

$$g_A(\mathbf{v}) = \left\{ \frac{\alpha_A S_A^* \sigma_{AA}}{H^*} \cdot \left( 1 - \frac{\alpha_J S_J^* \sigma_{JJ}}{H^*} \cdot \frac{\beta_J}{\mu_J} \right) + \frac{\alpha_J S_J^* \sigma_{JA}}{H^*} \cdot \left( \frac{u}{\mu_J} + \frac{\alpha_A S_A^* \sigma_{AJ}}{H^*} \cdot \frac{\beta_J}{\mu_J} \right) \right\} \times \frac{\beta_A}{\mu_A} \cdot \left( \frac{1}{\beta_A} \cdot \frac{d\beta_A}{dv_A} - \frac{1}{\mu_A} \right) \quad (9)$$

165 (Appendix A5) which is consistent with a number of previous studies: under the  
 166 transmission-virulence trade-off, higher exploitation is expected to increase the infectiousness  
 167 (i.e., a marginal benefit) at the immediate (marginal) costs owing to reduced infectious period  
 168 (Day 2001; Gandon *et al.* 2001; Day & Proulx 2004; Gandon 2004; Alizon *et al.* 2009; Cressler  
 169 *et al.* 2016; Williams & Kamel 2018). Therefore, the direction of selection on adult virulence is  
 170 completely determined by the balance between such benefits and costs.

171 In terms of juvenile-virulence, however, an additional term emerges in the present model  
 172 because of the host maturation rate  $u$ . To make the biological meaning of this term clearer,  
 173 we use the reproductive-value based form of the selection gradient (Fisher 1958; Taylor 1990;  
 174 Caswell 2001; Gandon 2004; Grafen 2006; Otto & Day 2007; Williams 2011; Williams & Kamel  
 175 2018; Lion 2018), which reads:

$$g_J(\mathbf{v}) \propto \left( \ell_J^* \cdot \frac{\alpha_J S_J^* \sigma_{JJ}}{H^*} + \ell_A^* \cdot \frac{\alpha_A S_A^* \sigma_{AJ}}{H^*} \right) \cdot \frac{\beta_J}{\mu_J} \times \left( \frac{1}{\beta_J} \cdot \frac{d\beta_J}{dv_J} - \frac{1}{\mu_J} \right) - \ell_A^* \cdot \frac{1}{\mu_J} \cdot \frac{u}{\mu_J} \quad (10)$$

from J to J                      from J to A

176 (Appendix A6-8), where  $(\ell_J^*, \ell_A^*)$  represents the pair of individual reproductive values of the  
177 parasites carried by juvenile and adult hosts (or the left eigenvector of  $\mathbf{G}$  at neutrality; Appendix).  
178 The first term represents the sum of reproductive success owing to transmission from an infected  
179 juvenile hosts to a susceptible juvenile and to a susceptible adult; once transmitted to a juvenile  
180 (or adult) host, the parasites can gain the relative reproductive success  $\ell_J^*$  (or  $\ell_A^*$ , respectively).  
181 In total, the first term obeys classic marginal value theorem (Charnov 1976; Bulmer 1994; Day  
182 2001; Gandon *et al.* 2001; Day & Proulx 2004; Gandon 2004; Alizon *et al.* 2009; Cressler *et al.* 2016;  
183 Williams & Kamel 2018) such that the marginal increase in transmission due to exploitation  
184 confers a benefit (associated with increased transmission) but the marginal decrease in infectious  
185 period imposes a cost on exploitation. The second term represents the reduction in successful  
186 maturation due to killing the juveniles and this term involves  $1/\mu_J$  (the marginal increase in  
187 juvenile mortality due to increasing virulence) times  $\ell_A^*$  (the individual reproductive value of the  
188 parasites infecting adults) times the probability of maturation of infected juveniles  $u/\mu_J$ . This  
189 is because killing juveniles can lead to the loss of expected reproductive success via adult hosts  
190 that the parasites could otherwise gain through the maturation of the juvenile host (Williams &  
191 Kamel 2018). In other words, killing the juvenile hosts can result in the reduction of prospective  
192 fitness.

193 We investigated the effects of (i) post-maturation span  $\theta_A$  and (ii) stage-assortativity  $\rho$ , on  
194 the evolutionary outcomes (i.e., CSS; Appendix A9). Strikingly, the CSS for adult virulence is  
195 necessarily  $v_A^* = \sqrt{m_A/k_A}$ , which is independent of any demographic and disease characteristics  
196 of juveniles. This is because the parasites infecting adults can utilize a single transmission

197 pathway from adults (to any susceptible hosts in the population). Hence, we used  $v_A^*$  as a  
198 benchmark result and compared it with  $v_J^*$ .

199 In contrast, CSS for juvenile-virulence is dramatically affected by the densities of  
200 susceptible hosts (ecological feedback), the adult virulence (epidemiological feedback), and  
201 stage-assortativity (demographic feedback). This is because the parasites infecting the juveniles  
202 can utilize two pathways of transmission: either from the juvenile (to any susceptible hosts), or  
203 from the adult who has successfully matured from the juvenile stage. The analytical expression  
204 for  $v_J^*$  is intractable, and thus we numerically evaluated  $v_J^*$ .

205 We can immediately see that  $v_A^*$  increases with  $m_A$ , in agreement with the previous studies  
206 (reviewed in Alizon *et al.* 2009; Cressler *et al.* 2016). To assess when selection favours higher  
207 juvenile-virulence than adult-virulence, we quantified  $v_J^*/v_A^*$  as a function of the assortativity  
208 ( $\rho$ , abscissa) and post-maturation span ( $\theta_A$ , ordinate; Fig 3). We found that either disassortative  
209 hosts with a long post-maturation span or assortative hosts with a short post-maturation span  
210 select for higher virulence against juveniles. This result slightly changes given stage-specific  
211 mortality rates ( $m_J \neq m_A$ ), but the general trend is robust (Fig 3A-C). Also, the combination  
212 of disassortativity and long post-maturation span leads to parasite extinction as a result of  
213 overexploitation against juveniles (Fig 3A; Appendix A10).

214 By relaxing the assumptions of the symmetry in disease-related parameters  $k_J, k_A$  (efficiency  
215 of exploitation for transmission),  $b_J, b_A$  (maximum transmissibility), and  $\alpha_J, \alpha_A$  (susceptibility)  
216 for juveniles and adults, or by incorporating recovery or tolerance, we showed that the results are  
217 robust and qualitatively unchanged (Appendix B). Therefore, we conclude that the combined

218 effects of maturation and assortativity are critical to the evolution of virulence.

## 219 Discussion

220 We have shown theoretically how parasites are subject to different selective pressures when  
221 they infect adults or juveniles. In particular, the key prediction is that the combination between  
222 maturation and contact-structure – fast maturation with disassortativity, or slow maturation  
223 with assortativity – has a dramatic impact on optimal juvenile-virulence. Higher virulence  
224 against juveniles is favored either if: (i) adult-stage is relatively long and the contact-structure  
225 is disassortative (between age class interactions are high; Fig 3, left-top zone), (ii) juvenile-stage  
226 is relatively long and the contact structure is assortative (interactions occur preferentially  
227 within classes; Fig 3, right-bottom zone). This result can be understood as follows: given  
228 that post-maturation span is long, and the contact structure is disassortative, adult hosts  
229 are abundant in the population and the transmission from juveniles to adults is more likely  
230 than between juveniles; in this case, the availability of adult hosts is higher, which selects for  
231 higher exploitation against juveniles to access to more abundant resource. The same reasoning  
232 works for the results of higher juvenile-virulence in short maturing and assortative hosts.  
233 Spatial and/or temporal segregation in the niches of juveniles and adults therefore has the  
234 potential to be an important evolutionary driver of virulence. Previous theory has overlooked  
235 the phenomena that virulence is highly sensitive to stage-structured life-history characteristics  
236 of hosts such as ontogeny and associated, spatio-temporal niche-shifts.

237 The incorporation of the maturation of the hosts in our model shows that higher parasite  
238 exploitation against juveniles incurs an additional cost associated with increased maturation



239 failure (Williams & Kamel 2018). In addition, non-random assortativity generates additional  
240 selective pressures (Gandon 2004; Osnas & Dobson 2011). In particular, while marginal value  
241 theorem does correctly predict the evolutionary outcomes of adult virulence it does not predict  
242 that of juvenile-virulence. Therefore, sources of heterogeneity in hosts can clearly lead to  
243 different predictions than classic virulence evolution theory based on the marginal value  
244 theorem and the trade-off hypothesis. Gandon (2004) and Osnas & Dobson (2011) introduced  
245 multiple hosts' types or species and studied conditional virulence against them, and Williams  
246 and colleagues (Williams *et al.* 2006; Williams 2011; Williams *et al.* 2014; Williams & Kamel 2018)  
247 have proposed to use reproductive value theory to study parasite evolution in heterogeneous  
248 host populations. However, none of these studies are devoted to stage structure with associated  
249 stage-specific virulence. Our novel results arise because we explicitly assumed stage structure  
250 with maturation from juveniles to adults and reproduction by adults rather than more generic  
251 heterogeneity between different types of hosts.

252 Finding examples of stage-specific virulence in empirical systems can be difficult due  
253 to the intricacies of specific host-pathogen systems. Stage-related trends in virulence  
254 can be complicated by age-related trends in maternal immunity, adaptive immunity, and  
255 exposure rate, and specific host-parasite system characteristics including maladaptation and  
256 immuno-pathogenicity (Hudson & Dobson 1995; Wilson *et al.* 2002). Additionally, studies  
257 looking at age-related virulence or case mortality do not exclusively look at differences between  
258 adult and juvenile stages and may focus on old age-mediated declines in immuno-competence.  
259 However, despite these issues, we found data on several empirical systems that lend support

260 to our predictions and may offer opportunities for testing our hypotheses Fig 1. In particular,  
261 Wanelik *et al.* (2017) showed that Great Island Virus (GIV) transmission in Guillemots (*Uria*  
262 *aalge*) is assortative across age classes because of the spatial structure of breeding grounds.  
263 GIV is transmitted by poorly motile ticks and pre-breeder stages of Guillemots do not enter  
264 breeding areas of the colony. As a consequence, the virus does not readily transmit between  
265 guillemot age-stages (Wanelik *et al.* 2017). Previous work on guillemot life history shows  
266 that the birds spend more than three quarters of their life-span as mature breeders (Harris  
267 & Wanless 1995), so the combination of assortative transmission and fast maturation predicts  
268 that GIV should be more virulent in breeders. In line with the predictions of our model,  
269 infection associated mortality risk is 1.45 times higher for adults than for juveniles (Nunn *et al.*  
270 2006). In contrast, (Jones *et al.* 2008) showed that salmon louse caused mortality in juvenile  
271 pink salmon (*Oncorhynchus gorbuscha*), but had no effect on mortality risk for adults. Salmon  
272 louse is also assortatively transmitted between age classes, because pink salmon have strict  
273 two-year lifespans where they are only ever associated with individuals of their same age class  
274 (Heard 1991). The salmon only reproduce once at the very end of their lives (semelparity),  
275 and therefore have a short adult period by our model. This short post-maturation stage and  
276 assortative transmission predicts the higher salmon louse virulence in juveniles.

277 Better data on mixing matrices for more disease systems could provide interesting insights  
278 into the maintenance of either high juvenile or high adult virulence. One system where these  
279 insights could prove especially important is in Bd (*Batrachochytrium dendrobatidis*, or chytrid  
280 fungus) infection in frogs, which has been causing catastrophic worldwide declines in frog

281 populations (Kilpatrick *et al.* 2010). Bd infection has been shown to have different virulence  
282 effects in the different frog life-stages (Medina *et al.* 2015; Hite *et al.* 2016) and these effects  
283 also vary by frog species (Berger *et al.* 1998; Blaustein *et al.* 2005). Recent work has shown  
284 that adult virulence in several frog populations has not decreased even after 20 years of Bd  
285 presence (Voyles *et al.* 2018). Already, frog demography has been implicated as an important  
286 factor for population persistence in the face of Bd with frog species where adults move away  
287 from breeding waters being more resistant to population declines (Lips *et al.* 2006; McCaffery  
288 *et al.* 2015), but habitats with multi-year larvae have more severe epidemics because the older  
289 stages maintain high levels of infection that then spill over to infect other stages and species  
290 (Medina *et al.* 2015; Hite *et al.* 2016). Changes in the assortiveness of mixing clearly has important  
291 implications for disease transmission across stages, and our model suggests that it could also  
292 have implications for the maintenance of high virulence in different age stages.

293 While data on age-related contact patterns are difficult to access for wildlife populations,  
294 a wealth of mixing data exists for humans (Mossong *et al.* 2008; Rohani *et al.* 2010). These  
295 suggest that contacts relevant for the transmission of directly transmitted pathogens are  
296 highly assortative by age. While the evolutionary drivers of human pathogens is sometimes  
297 complicated, we posit that chickenpox (varicella virus) virulence in humans proves an intriguing  
298 case study. Given that humans have a long juvenile period in the context of our model, even  
299 when we only consider pre-reproductive and reproductive periods (Bogin & Smith 1996), the  
300 higher virulence in adults of Chickenpox (23-29 times higher mortality risk in adults (Heininger  
301 & Seward 2006)) fits the predictions of our model. This higher mortality risk corresponds

302 to increased viral titers with age (Malavige *et al.* 2008) and, perhaps most interestingly, while  
303 varicella virus infects many cell-types, T cell infection is thought to be important for transport  
304 and pathogenesis (Zerboni & Arvin 2016). Therefore, age-related trends in T-cell abundance  
305 could be implicated in chickenpox pathogenesis, although this relationship is complicated by  
306 the fact that VSV-specific T cell responses are also correlated with decreased viral titer and  
307 diminish with age (Erkeller-Yuksel *et al.* 1992; Nader *et al.* 1995; Malavige *et al.* 2008). Still,  
308 this example points towards one mechanism that may underlie the mediation of age-specific  
309 virulence in pathogens.

310 Our models have implications for disease management especially in farmed and other  
311 managed animal populations. For instance, if the post-maturation span is short (i.e. if  $u$  is small),  
312 then artificial restriction of the contacts between stages is predicted to select for higher virulence.  
313 However, if the post-maturation span is long, restricting the contacts into juvenile-juvenile and  
314 adult-adult (by e.g., separating the cohorts) can lead to the parasite extinction as a result of  
315 overexploitation against the juveniles. These contrasting outcomes can occur for any given host  
316 species, depending on how management modulates host stage-structure. Our models thus  
317 predict that, to prevent evolutionary changes towards higher virulence, one needs to carefully  
318 take into account the cohort structure.

319 For simplicity and tractability we chose to use simple two-stage models rather than a  
320 more continuous “infection-age” models (which would entail the formalism based on partial  
321 differential equations and dynamic programming approach). Future studies that capture more  
322 continuous age structure are an important next step. Also, although we assumed that parasites

323 can express conditional virulence depending on the stage of the hosts they infect with, more  
324 data are needed to test this idea. In addition, coevolutionary models are likely to give further  
325 important insights to the determinants of age-dependent disease interactions in nature. Our  
326 approach offers the basis for modeling these coevolutionary dynamics between hosts and  
327 parasites when there is stage structure.

## 328 **References**

- 329 Alizon, S. *et al.* (2009). "Virulence evolution and the trade-off hypothesis: history, current state  
330 of affairs and the future". *J. Evol. Biol.* **22.2**, pp. 245–259.
- 331 Anderson, R. M. & May, R. (1982). "Coevolution of hosts and parasites". *Parasitology* **85.2**,  
332 pp. 411–426.
- 333 Ball, G. H. (1943). "Parasitism and evolution". *Am. Nat.* **77.771**, pp. 345–364.
- 334 Berger, L. *et al.* (1998). "Chytridiomycosis causes amphibian mortality associated with  
335 population declines in the rain forests of Australia and Central America". *PNAS* **95.15**,  
336 pp. 9031–9036.
- 337 Best, A. *et al.* (2014). "The coevolutionary implications of host tolerance". *Evolution* **68.5**,  
338 pp. 1426–1435.
- 339 Blaustein, A. R. *et al.* (2005). "Interspecific variation in susceptibility of frog tadpoles to the  
340 pathogenic fungus *Batrachochytrium dendrobatidis*". *Conserv. Biol.* **19.5**, pp. 1460–1468.
- 341 Bogin, B. & Smith, B. H. (1996). "Evolution of the human life cycle". *Am. J. Hum. Biol.* **8.6**,  
342 pp. 703–716.
- 343 Boots, M. & Sasaki, A. (2003). "Parasite evolution and extinctions". *Ecol. Lett.* **6.3**, pp. 176–182.
- 344 Boots, M. *et al.* (Jan. 2009). "The role of ecological feedbacks in the evolution of host defence:  
345 what does theory tell us?" *Phil. Trans. Roy. Soc. B: Biol. Sci.* **364.1513**, p. 27.
- 346 Briggs, C. & Godfray, H. (1995). "The dynamics of insect-pathogen interactions in  
347 stage-structured populations". *Am. Nat.* **145.6**, pp. 855–887.
- 348 Bull, J. J. & Luring, A. S. (2014). "Theory and empiricism in virulence evolution". *PLoS Path.*  
349 **10.10**, e1004387.
- 350 Bulmer, M. G. (1994). *Evolutionary theoretical ecology*. Sinauer Associates, Sunderland, MA.

- 351 Camino Beck, T. de & Lewis, M. A. (2007). "A new method for calculating net reproductive rate  
352 from graph reduction with applications to the control of invasive species". *Bull. Math. Biol.*  
353 **69.4**, pp. 1341–1354.
- 354 — (2008). "On Net Reproductive Rate and the Timing of Reproductive Output". *Am. Nat.* **172.1**,  
355 pp. 128–139.
- 356 Camino Beck, T. de *et al.* (2008). "A graph-theoretic method for the basic reproduction number  
357 in continuous time epidemiological models". *J. Math. Biol.* **59.4**, pp. 503–516.
- 358 Caswell, H. (2001). *Matrix population models*. Wiley Online Library.
- 359 Charnov, E. L. (1976). "Optimal foraging, the marginal value theorem". *Theor. Pop. Biol.* **9.2**,  
360 pp. 129–136.
- 361 Christiansen, F. B. (1991). "On conditions for evolutionary stability for a continuously varying  
362 character". *Am. Nat.* Pp. 37–50.
- 363 Cornell, S. J. *et al.* (2008). "Seasonality, cohort-dependence and the development of immunity  
364 in a natural host–nematode system". *Proc. B* **275.1634**, pp. 511–518.
- 365 Craft, M. E. (2015). "Infectious disease transmission and contact networks in wildlife and  
366 livestock". *Phil. Trans. Roy. Soc. B* **370.1669**, p. 20140107.
- 367 Cressler, C. E. *et al.* (2016). "The adaptive evolution of virulence: a review of theoretical  
368 predictions and empirical tests". *Parasitology* **143.7**, pp. 915–30.
- 369 Day, T. (2001). "Parasite transmission modes and the evolution of virulence". *Evolution* **55.12**,  
370 pp. 2389–2400.
- 371 Day, T. & Proulx, S. R. (2004). "A general theory for the evolutionary dynamics of virulence".  
372 *Am. Nat.* **163.4**, E40–E63.
- 373 Day, T. *et al.* (2011). "Bridging scales in the evolution of infectious disease life histories: theory".  
374 *Evolution* **65.12**, pp. 3448–3461.
- 375 De Castro, F. & Bolker, B. (2005). "Mechanisms of disease-induced extinction". *Ecol. Lett.* **8.1**,  
376 pp. 117–126.
- 377 Dieckmann, U. (2005). *Adaptive dynamics of infectious diseases: in pursuit of virulence management.*  
378 **2**. Cambridge University Press.
- 379 Dieckmann, U. & Law, R. (1996). "The dynamical theory of coevolution: a derivation from  
380 stochastic ecological processes". *J. Math. Biol.* **34.5-6**, pp. 579–612.
- 381 Driessche, P. Van den & Watmough, J. (2002). "Reproduction numbers and sub-threshold  
382 endemic equilibria for compartmental models of disease transmission". *Math. Biosci.* **180.1**,  
383 pp. 29–48.

- 384 Dwyer, G. (1991). "The roles of density, stage, and patchiness in the transmission of an insect  
385 virus". *Ecology* **72.2**, pp. 559–574.
- 386 Ebert, D. & Herre, E. A. (1996). "The evolution of parasitic diseases". *Paras. Tod.* **12.3**, pp. 96–101.
- 387 Erkeller-Yuksel, F. M. *et al.* (1992). "Age-related changes in human blood lymphocyte  
388 subpopulations". *J. Pedi.* **120.2**, pp. 216–222.
- 389 Eshel, I. (1983). "Evolutionary and continuous stability". *J. Theor. Biol.* **103.1**, pp. 99–111.
- 390 Ewald, P. W. (1983). "Host-parasite relations, vectors, and the evolution of disease severity".  
391 *Ann. Rev. Ecol. Syst.* **14.1**, pp. 465–485.
- 392 Fisher, R. A. (1958). *The genetical theory of natural selection*. Tech. rep. Dover Publications,
- 393 Fleming-Davies, A. E. *et al.* (2015). "Effects of host heterogeneity on pathogen diversity and  
394 evolution". *Ecol. Lett.* **18.11**, pp. 1252–1261.
- 395 Frank, S. A. (1996). "Models of parasite virulence". *Quart. Rev. Biol.* Pp. 37–78.
- 396 — (1998). *Foundations of social evolution*. Princeton University Press.
- 397 Gandon, S. (2004). "Evolution of multihost parasites". *Evolution* **58.3**, pp. 455–469.
- 398 Gandon, S. *et al.* (2001). "Host life history and the evolution of parasite virulence". *Evolution*  
399 **55.5**, pp. 1056–1062.
- 400 Glasser, J. *et al.* (2012). "Mixing in age-structured population models of infectious diseases".  
401 *Math. Biosci.* **235.1**, pp. 1–7.
- 402 Grafen, A. (2006). "A theory of Fisher's reproductive value". *J. Math. Biol.* **53.1**, pp. 15–60.
- 403 Harris, M. & Wanless, S (1995). "Survival and non-breeding of adult Common Guillemots *Uria*  
404 *aalge*". *Ibis* **137.2**, pp. 192–197.
- 405 Hawlena, H. *et al.* (2006). "Ectoparasites and age-dependent survival in a desert rodent".  
406 *Oecologia* **148.1**, pp. 30–39.
- 407 Heard, W. R. (1991). "Life history of pink salmon (*Oncorhynchus gorbuscha*)". *Pacific salmon life*  
408 *histories*, pp. 119–230.
- 409 Heininger, U. & Seward, J. F. (2006). "Varicella". *The Lancet* **368.9544**, pp. 1365–1376.
- 410 Hite, J. L. *et al.* (2016). "Parasites destabilize host populations by shifting stage-structured  
411 interactions". *Ecology* **97.2**, pp. 439–449.
- 412 Hofbauer, J. & Sigmund, K. (1990). "Adaptive dynamics and evolutionary stability". *Appl. Math.*  
413 *Lett.* **3.4**, pp. 75–79.
- 414 Holst, D. von *et al.* (2002). "Social rank, fecundity and lifetime reproductive success in wild  
415 European rabbits (*Oryctolagus cuniculus*)". *Behav. Ecol. Sociobiol.* **51.3**, pp. 245–254.

- 416 Hudson, P. J. & Dobson, A. P. (1995). "Macroparasites: observed patterns". *Ecology of Infectious*  
417 *Diseases in Natural Populations*. Ed. by B. T. Grenfell & A. P. Dobson. Cambridge University  
418 Press, pp. 144–176.
- 419 Hurford, A. *et al.* (2010). "Next-generation tools for evolutionary invasion analyses". *J. Roy. Soc.*  
420 *Int.* **7.45**, pp. 561–571.
- 421 Iritani, R. & Cheptou, P.-O. (2017). "Joint evolution of differential seed dispersal and  
422 self-fertilization". *J. Evol. Biol.* **30.8**, pp. 1526–1543.
- 423 Jones, S *et al.* (2008). "Early development of resistance to the salmon louse, *Lepeophtheirus salmonis*  
424 (Krøyer), in juvenile pink salmon, *Oncorhynchus gorbuscha* (Walbaum)". *J. Fish Dis.* **31.8**,  
425 pp. 591–600.
- 426 Kilpatrick, A. M. *et al.* (2010). "The ecology and impact of chytridiomycosis: an emerging disease  
427 of amphibians". *Trends. Ecol. & Evol.* **25.2**, pp. 109–118.
- 428 Lack, D. L. (1968). "Ecological adaptations for breeding in birds".
- 429 Lion, S. (2018). "Class structure, demography, and selection: reproductive-value weighting in  
430 nonequilibrium, polymorphic populations". *Am. Nat.* Pp. 000–000.
- 431 Lion, S. & Metz, J. A. J. (2018). "Beyond  $R_0$  maximisation: on pathogen evolution and  
432 environmental dimensions". *Trends. Ecol. & Evol.* **33**, pp. 75–90.
- 433 Lips, K. R. *et al.* (2006). "Emerging infectious disease and the loss of biodiversity in a Neotropical  
434 amphibian community". *PNAS* **103.9**, pp. 3165–3170.
- 435 Lynsdale, C. L. *et al.* (2017). "Parasite-associated mortality in a long-lived mammal: Variation  
436 with host age, sex, and reproduction". *Ecol. Evol.* **7.24**, pp. 10904–10915.
- 437 Malavige, G. N. *et al.* (2008). "Viral load, clinical disease severity and cellular immune responses  
438 in primary varicella zoster virus infection in Sri Lanka". *PloS one* **3.11**, e3789.
- 439 Massol, F. & Cheptou, P.-O. (2011). "Evolutionary syndromes linking dispersal and mating  
440 system: the effect of autocorrelation in pollination conditions". *Evolution* **65.2**, pp. 591–598.
- 441 Massol, F. & Débarre, F. (2015). "Evolution of dispersal in spatially and temporally variable  
442 environments: The importance of life cycles". *Evolution* **69.7**, pp. 1925–1937.
- 443 Maynard Smith, J. & Price, G. R. (1973). "The Logic of Animal Conflict". *Nature* **246**, p. 15.
- 444 McCaffery, R. *et al.* (2015). "The demography of *Atelopus decline*: Harlequin frog survival and  
445 abundance in central Panama prior to and during a disease outbreak". *Glob. Ecol. Cons.* **4**,  
446 pp. 232–242.
- 447 McCallum, H. *et al.* (2001). "How should pathogen transmission be modelled?" *Trends. Ecol. &*  
448 *Evol.* **16.6**, pp. 295–300.



- 449 Medina, D. *et al.* (2015). "Delayed metamorphosis of amphibian larvae facilitates  
450 *Batrachochytrium dendrobatidis* transmission and persistence". *Dise. Aqu. Organ.* **117.2**,  
451 pp. 85–92.
- 452 Mideo, N. *et al.* (2008). "Linking within-and between-host dynamics in the evolutionary  
453 epidemiology of infectious diseases". *Trends. Ecol. & Evol.* **23.9**, pp. 511–517.
- 454 Mideo, N. *et al.* (2011). "Bridging scales in the evolution of infectious disease life histories:  
455 application". *Evolution* **65.11**, pp. 3298–3310.
- 456 Morisse, J. *et al.* (1991). "Hepatitis of viral origin in Leporidae: introduction and aetiological  
457 hypotheses." *Revue scientifique et technique (International Office of Epizootics)* **10.2**, pp. 269–310.
- 458 Mossong, J. *et al.* (2008). "Social contacts and mixing patterns relevant to the spread of infectious  
459 diseases". *PLoS Med.* **5.3**, e74.
- 460 Nader, S. *et al.* (1995). "Age-related differences in cell-mediated immunity to varicella-zoster  
461 virus among children and adults immunized with live attenuated varicella vaccine". *J. Infec.*  
462 *Dise.* **171.1**, pp. 13–17.
- 463 Nunn, M. *et al.* (2006). "Tick-borne Great Island Virus:(II) Impact of age-related acquired  
464 immunity on transmission in a natural seabird host". *Parasitology* **132.2**, pp. 241–253.
- 465 Osnas, E. E. & Dobson, A. P. (2011). "Evolution of virulence in heterogeneous host communities  
466 under multiple trade-offs". *Evolution* **66.2**, pp. 391–401.
- 467 Otto, S. P. & Day, T. (2007). *A biologist's guide to mathematical modeling in ecology and evolution*. **13**.  
468 Princeton University Press.
- 469 Read, A. F. (1994). "The evolution of virulence". *Trends in Microbiol.* **2.3**, pp. 73–76.
- 470 Reluga, T. C. *et al.* (2007). "Optimal timing of disease transmission in an age-structured  
471 population". *Bull. Math. Biol.* **69.8**, pp. 2711–2722.
- 472 Rodrigues, A. M. M. & Gardner, A. (2012). "Evolution of helping and harming in heterogeneous  
473 populations". *Evolution* **66.7**, pp. 2065–2079.
- 474 Rohani, P. *et al.* (2010). "Contact network structure explains the changing epidemiology of  
475 pertussis". *Science* **330.6006**, pp. 982–985.
- 476 Roos, A. M. de & Persson, L. (2013). *Population and community ecology of ontogenetic development*.  
477 Princeton University Press.
- 478 Schmid-Hempel, P. (2011). *Evolutionary parasitology: the integrated study of infections, immunology,*  
479 *ecology, and genetics*. Oxford University Press, New York.
- 480 Schreiber, S. & Rudolf, V. H. (2008). "Crossing habitat boundaries: coupling dynamics of  
481 ecosystems through complex life cycles". *Ecol. Lett.* **11.6**, pp. 576–587.

- 482 Smith, T. (1904). "Some problems in the life history of pathogenic microorganisms". *Science*  
483 **20.520**, pp. 817–832.
- 484 Sol, D. *et al.* (2003). "Parasite mediated mortality and host immune response explain age-related  
485 differences in blood parasitism in birds". *Oecologia* **135.4**, pp. 542–547.
- 486 Sukumar, R *et al.* (1997). "Demography of captive Asian elephants (*Elephas maximus*) in southern  
487 India". *Zoo Biol.* **16.3**, pp. 263–272.
- 488 Takada, T. & Kigami, J. (1991). "The dynamical attainability of ESS in evolutionary games". *J.*  
489 *Math. Biol.* **29.6**, pp. 513–529.
- 490 Taylor, P. D. (1990). "Allele-frequency change in a class-structured population". *Am. Nat.* **135**,  
491 pp. 95–106.
- 492 Van Baalen, M. & Sabelis, M. W. (1995). "The scope for virulence management: a comment on  
493 Ewald's view on the evolution of virulence". *Trends in Microbiol.* **3.11**, pp. 414–416.
- 494 VanderWaal, K. L. & Ezenwa, V. O. (2016). "Heterogeneity in pathogen transmission:  
495 mechanisms and methodology". *Funct. Ecol.* **30.10**. Ed. by D. Hawley, pp. 1606–1622.
- 496 Voyles, J. *et al.* (2018). "Shifts in disease dynamics in a tropical amphibian assemblage are not  
497 due to pathogen attenuation". *Science* **359.6383**, pp. 1517–1519.
- 498 Wanelik, K. M. *et al.* (2017). "Investigating the effects of age-related spatial structuring on  
499 the transmission of a tick-borne virus in a colonially breeding host". *Ecol. Evol.* **7.24**,  
500 pp. 10930–10940.
- 501 Wassif, K. & Soliman, S. (1980). "Population studies on gerbils of the western desert of Egypt,  
502 with special reference to *Gerbillus andersoni* de Winton". *Proceedings of the 9th Vertebrate Pest*  
503 *Conference (1980)*, p. 41.
- 504 White, L. A. *et al.* (2017). "Using contact networks to explore mechanisms of parasite  
505 transmission in wildlife". *Biol. Rev.* **92.1**, pp. 389–409.
- 506 Williams, P. D. *et al.* (2006). "The shaping of senescence in the wild". *Trends. Ecol. & Evol.* **21.8**,  
507 pp. 458–463.
- 508 Williams, P. D. *et al.* (2014). "Evidence of trade-offs shaping virulence evolution in an emerging  
509 wildlife pathogen". *J. Evol. Biol.* **27.6**, pp. 1271–1278.
- 510 Williams, P. D. (2011). "New insights into virulence evolution in multigroup hosts". *Am. Nat.*  
511 **179.2**, pp. 228–239.
- 512 Williams, P. D. & Kamel, S. J. (2018). "The evolution of pathogen virulence: Effects of transitions  
513 between host types". *J. Theor. Biol.* **438**, pp. 1–8.

- 514 Wilson, K. *et al.* (2002). "Heterogeneities in macroparasite infections: patterns and processes".  
515 *The Ecology of Wildlife Diseases* **44**, pp. 6–44.
- 516 Zerboni, L. & Arvin, A. M. (2016). "The pathogenesis of varicella-zoster virus neurotropism and  
517 infection". *Neurotropic viral infections*. Springer, pp. 135–173.

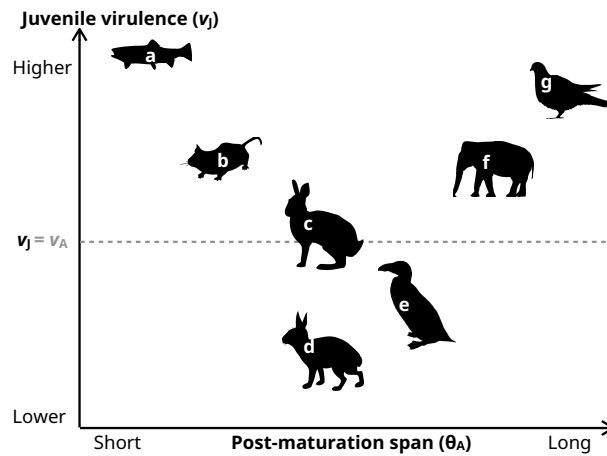

Figure 1: A graphical representation of the empirical data on stage-specific virulence. In the following, H indicates “host” while P indicates “parasites” : (a) H: Pink Salmon (*Oncorhynchus gorboscha*); P: Salmon Louse (Heard 1991; Jones *et al.* 2008). (b) H: Gerbil (*Gerbillus andersoni*); P: Ectoparasites (Wassif & Soliman 1980; Hawlena *et al.* 2006). (c) H: European Rabbit (*Oryctolagus cuniculus*); P: Nematode (Holst *et al.* 2002; Cornell *et al.* 2008). (d) H: Rabbits (*Leporidae*); P: RHD Virus (Morisse *et al.* 1991; Reluga *et al.* 2007). (e) H: Common Guillemot (*Uria aalge*); P: Great Island Virus (Harris & Wanless 1995; Nunn *et al.* 2006; Wanelik *et al.* 2017). (f) H: Asian Elephant (*Elephas maximus*); P: Parasites (Sukumar *et al.* 1997; Lynsdale *et al.* 2017). (g) H: Pigeon (*Columba livia*) P: Blood parasites (Lack 1968; Sol *et al.* 2003)

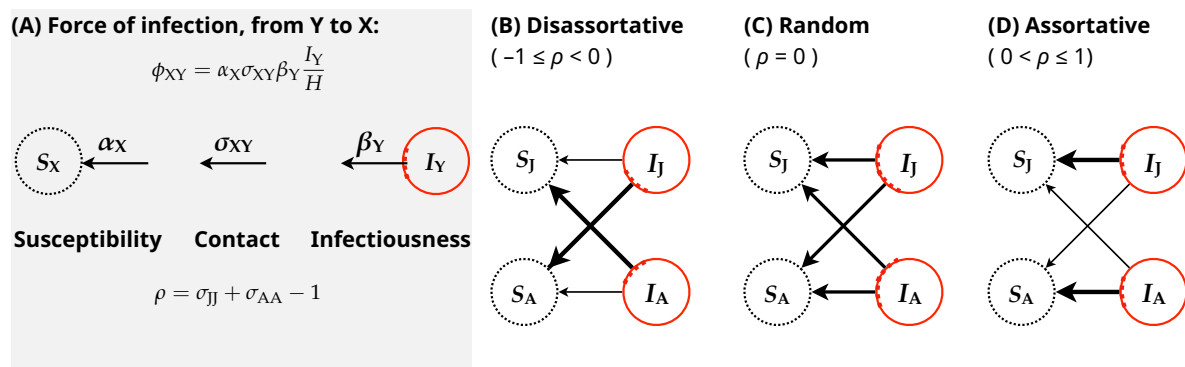

Figure 2: A schematic illustration of the model on the force of infection and assortativity. (A) Force of infection from Y to X,  $\phi_{XY}$ , is a compound factor of susceptibility (likeliness of X-hosts becoming infected), contact intensity (likeliness of contacts between X and Y), and infectiousness (propagule production of the parasite carried by Y). (B-D) Degrees of assortativity. Negative assortativity indicates that contacts occur more frequently between stages than within stages (panel B). The contact structure is unbiased (random) when  $\rho = 0$  (panel C). Positive assortativity indicates that contacts occur more frequently within stages than between stages (panel D).

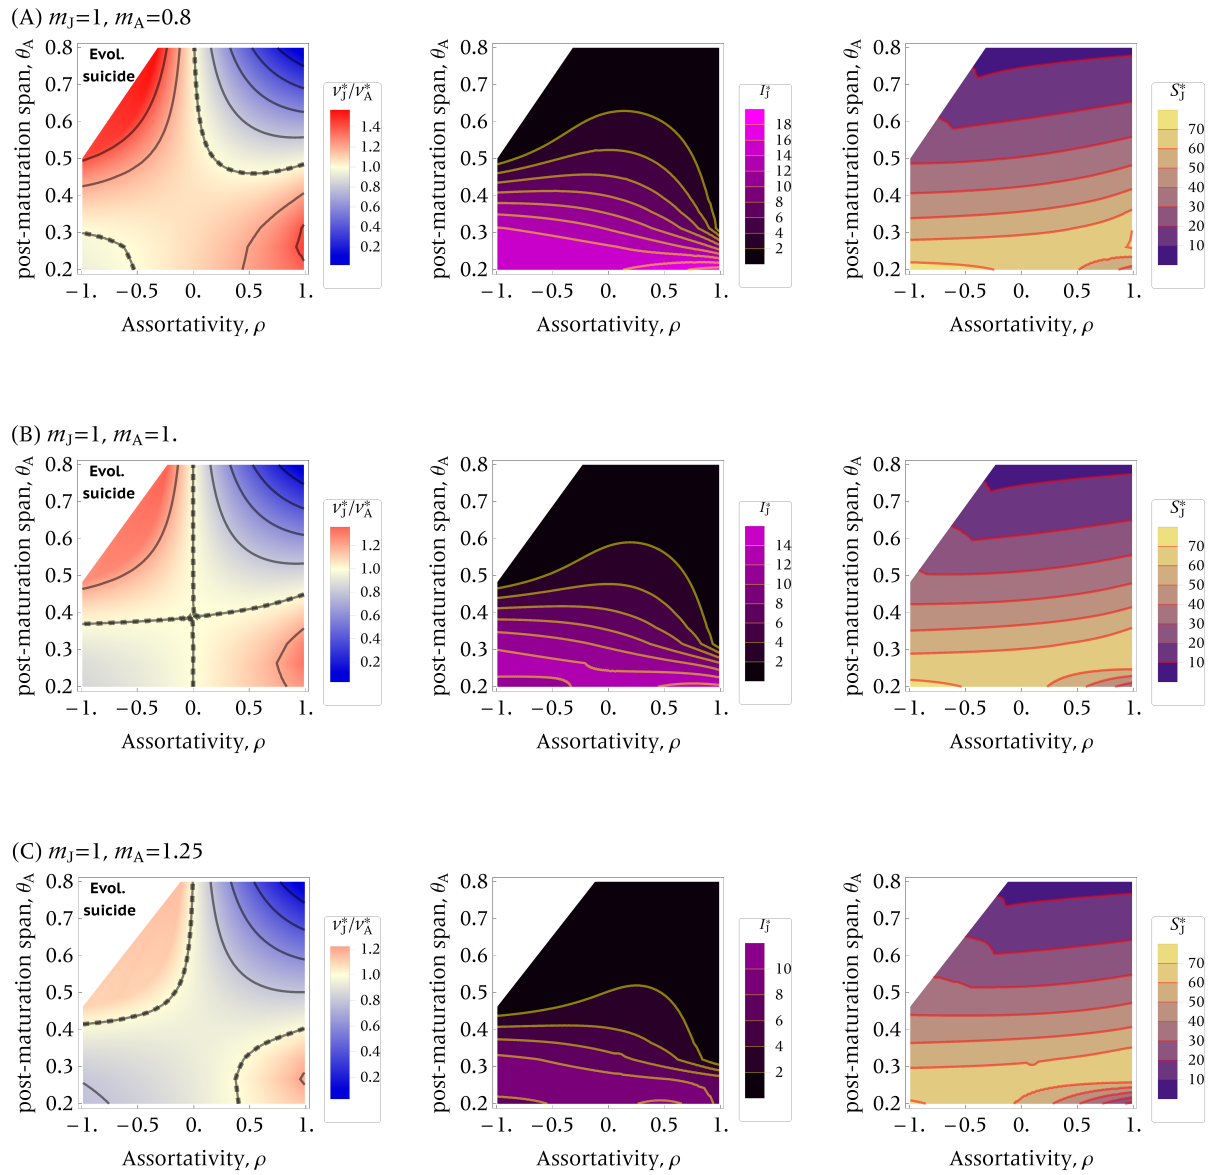

Figure 3: Left panels: Evolutionary outcomes of relative virulence ( $v_j^*/v_A^*$ ), in which red color indicates  $v_j^* > v_A^*$  and blue color indicates  $v_j^* < v_A^*$ . Color scales used are the same in the three panels. Middle panels: Densities of infected juveniles at equilibrium,  $I_j^*$ . Right panels: Densities of susceptible juveniles at equilibrium,  $S_j^*$ . In each panel, abscissa: assortativity; ordinate: post-maturation span  $\theta_A$ ; from (A) to (C):  $m_A = 0.8, 1.0, 1.25$  as indicated; White zone: evolutionary suicide; dotted curve:  $v_j^* = v_A^*$  (equal virulence); parameters: default values. We numerically evaluated CSS-virulence and densities of infected juveniles and adults.
