## The evolution of stage-specific virulence: differential selection of parasites in juveniles

Ryosuke IRITANI<sup>\*,1-4</sup>, Elisa VISHER<sup>2,5</sup> & Mike BOOTS<sup>2,7,8</sup>

September 29, 2018

Author for correspondance: RI, E-mail: Lambtani@gmail.com; tel: +1 (510) 642-3281; fax: +1 (510) 643-6264

Contact information:

1. Biosciences, College of Life and Environmental Science, University of Exeter, Exeter, United Kingdom.
2. Department of Integrative Biology, University of California, Berkeley, 3040 Valley Life Sciences Building #3140, Berkeley, CA 94720-3140.
3. ORCID: 0000-0002-2396-1109
4. E-mail: Lambtani@gmail.com
5. ORCID: 0000-0003-3984-4748
6. E-mail: elisa\_visher@berkeley.edu
7. ORCID: 0000-0003-3763-6136
8. E-mail: mboots@berkeley.edu

Author contribution: RI and EV conceived and designed the study, RI carried out model analyses, RI and MV drafted the initial version of the manuscript and all authors contributed to later versions of the manuscript.

Conflict of interest: None.

Data accessibility: No data is used for this study; a supplementary material for detailed mathematical analyses has been submitted in a separate file.

Number of words in abstract: 150

Number of words in main text: 3600

Number of graphic figures: 3

Number of papers cited: 97

Running title: Evolution of stage-specific virulence

Key words: Parasite virulence; Adaptive dynamics; Life-history evolution; Age-structured population; Senescence

Artcile type: Letter

### **Abstract**

The impact of infectious disease is often very different in juveniles and adults, but theory has focused on the drivers of stage-dependent defense in hosts rather than the potential for stage-dependent virulence evolution. Stage-structure has the potential to be important to the evolution of pathogens because it exposes parasites to heterogeneous environments in terms of both host characteristics and transmission routes. We develop a stage-structured (juvenile-adult) epidemiological model and examine the evolutionary outcomes of stage-specific virulence under the classic assumption of a transmission-virulence trade-off. We show that selection on virulence against adults remains consistent with the classic theory. However, the evolution of juvenile virulence is sensitive to both demography and contact structure with higher virulence against juveniles being favored either when the contact structure is assortative (juveniles preferentially interact together) and the juvenile stage is short, or in contrast when the contact structure is disassortative and the juvenile stage is long. These results highlight the potentially profound effects of host stage-structure on determining parasite virulence in nature. This new perspective may have broad implications for both understanding and managing disease severity.

## 1 Introduction

2 Understanding how parasites are selected to exploit their hosts remains a central research question in the  
3 evolutionary ecology of host-parasite interactions (Smith 1904; Ball 1943; Anderson & May 1982; Read 1994;  
4 Ebert & Herre 1996; Frank 1996; Alizon *et al.* 2009; Schmid-Hempel 2011; Bull & Luring 2014; Cressler  
5 *et al.* 2016), with important implications for host persistence (Boots & Sasaki 2003; De Castro & Bolker 2005),  
6 disease management (Dieckmann 2005), and host-parasite coevolution (Boots *et al.* 2009). Although most of  
7 the theory of evolution of virulence (defined in this literature as the increased death rate due to infection)  
8 focuses on homogenous host populations, heterogeneity within host populations is ubiquitous in nature  
9 (Anderson & May 1992, Chapter 8-11). One typical form of host heterogeneity is stage-related structure  
10 (e.g., juveniles and adults), and a number of recent ecological studies have examined the impacts of host  
11 populations' stage-related heterogeneity on disease epidemiology (e.g., Dwyer 1991; Fleming-Davies *et al.*  
12 2015; Hite *et al.* 2016; for theory, Ashby & Bruns 2018). In these studies, the differences in virulence across life  
13 stages have been explained as age-related variation in tolerance, resistance, exposure, immunocompetence,  
14 and susceptibility and affected by maternal and acquired immunity (Hudson & Dobson 1995; Wilson *et al.*  
15 2002).

16 In addition to age-related variation in the hosts, different host age-classes expose parasites to specific  
17 environmental heterogeneity (see Ashby & Bruns 2018, for theory). Given this, parasites may adaptively tune  
18 conditional exploitation against certain stage classes, e.g., through plasticity or by infecting tissues and/or cells  
19 that are differentially expressed at different stage classes. In principle, stage-specific virulence may occur as  
20 a result of parasite adaptation in two ways. First, stage-structure can generate different infectious periods,  
21 for instance due to the substantial difference in natural mortality between juveniles and adults (Jones *et al.*  
22 2013). Infectious period is therefore stage-dependent, which, according to the theory (Day 2001; Gandon  
23 *et al.* 2001; Day & Proulx 2004; Gandon 2004; Alizon *et al.* 2009; Cressler *et al.* 2016), may induce selection on

24 virulence such that a shorter infectious period in a certain stage of hosts favors higher virulence. Secondly, the  
25 hosts' stage-structure can generate biased transmission-pathways, thereby exposing the parasites to temporal  
26 heterogeneity, which may induce additional selective pressures (reviewed in Lion & Metz 2018). For instance,  
27 spatio-temporal segregation between juveniles and adults, which is typical of humans (Rohani *et al.* 2010),  
28 amphibians (Kilpatrick *et al.* 2010), and insects (Briggs & Godfray 1995), can produce assortative contact  
29 structure (i.e., juvenile-juvenile and adult-adult contacts might be more likely than juvenile-adult contacts),  
30 such that parasites infecting a certain stage of hosts are likely to be transmitted to the same stage of hosts  
31 ("assortative" transmission). Despite these potentially important selective forces on stage-specific virulence,  
32 the implications of host stage-structure for parasite fitness and evolution of stage-specific virulence have not  
33 been examined.

34 Here, we extend classic models of virulence evolution to include two host stage-classes (pre and post  
35 reproductive) where the juveniles mature into adults, the adults reproduce, and transmission between the  
36 stage-classes is characterized by a contact matrix. We explore the evolutionary outcomes of stage-specific  
37 virulence in light of classic theory of life-history evolution in heterogeneous populations. We use the adaptive  
38 dynamics toolbox (Hofbauer & Sigmund 1990; Dieckmann & Law 1996), first showing that the evolutionary  
39 outcomes of virulence against adults ("adult-virulence") are explained by the classic, optimization-principle  
40 (Lion & Metz 2018) (i.e., the evolutionarily stable virulence maximizes the number of secondary infection  
41 from infected adult host in a fully susceptible population). Second, we show that the evolutionary outcomes of  
42 virulence against juveniles ("juvenile-virulence") are critically impacted by the interplay between assortativity  
43 and the duration of the adult-stage. This is in part because juvenile-virulence can attenuate successful  
44 maturation of juvenile hosts and consequently loses future secondary infection from adults. We then use  
45 Fisher's reproductive values (Fisher 1958; Taylor 1990; Williams 2011; Williams & Kamel 2018; Lion 2018)  
46 (i.e., the long-term relative contributions of parasites infecting juveniles and adults to future populations), in  
47 order to gain a deeper biological insight into the selection gradients. We highlight the pivotal importance of

48 stage-structure to the evolution of infectious disease.

## 49 Method

50 We consider a host population structured into juvenile (J) and adult (A) stages, in which juveniles are  
 51 obviously incapable of reproduction. The density of susceptible or infected juveniles is denoted  $S_J$  or  $I_J$   
 52 respectively, and that of susceptible or infected adults is denoted  $S_A$  or  $I_A$  respectively. Combining an  
 53 epidemiological SI-model with a stage-structured model yields the following ordinary differential equations  
 54 (ODEs; Appendix A1):

$$\begin{aligned}
 \frac{dS_J}{dt} &= (r - \kappa(S_A + I_A)) \cdot (S_A + I_A) - (u + \varphi_{JJ} + \varphi_{JA} + m_J) S_J \\
 \frac{dS_A}{dt} &= uS_J - (m_A + \varphi_{AJ} + \varphi_{AA}) S_A \\
 \frac{dI_J}{dt} &= (\varphi_{JJ} + \varphi_{JA}) S_J - \underbrace{(u + m_J + v_J)}_{=: \mu_J} I_J \\
 \frac{dI_A}{dt} &= (\varphi_{AJ} + \varphi_{AA}) S_A + uI_J - \underbrace{(m_A + v_A)}_{=: \mu_A} I_A,
 \end{aligned} \tag{1}$$

55 where:  $r$  represents a fecundity of the adult hosts per capita (assumed to be the same for susceptible and  
 56 infected adults), which is reduced by a density-dependent factor  $\kappa$ ; juveniles mature into adults at a rate  $u$ ;  $m_X$   
 57 represents the background mortality for a stage-X host;  $\varphi_{XY}$  represents the rate at which a susceptible stage-X  
 58 host gets transmitted from an infected stage-Y host (i.e., force of infection from infectious Y to susceptible X  
 59 per capita, Fig 2; also see below for formula);  $v_X$  represents the virulence against a stage-X host (an evolving  
 60 trait). The reciprocal of the infectious period for juveniles (or adults) is given by  $\mu_J = u + m_J + v_J$  (or by  $\mu_A =$   
 61  $m_A + v_A$  respectively). For alternative approaches including physiologically structured population modeling  
 62 and infection-age modeling with continuous stage structure, see Day *et al.* (2011), Mideo *et al.* (2011), and de  
 63 Roos & Persson (2013). The present methodology allows us to evaluate the relative virulence against juveniles

64 compared to adults.

65 Maturation and natural mortality can both affect the relative length of a adult-stage of the hosts. To  
 66 quantify this, let  $\theta_A$  be the expected fraction of time a host individual spends as an adult in the entire lifespan  
 67 in the absence of disease, which reads (Appendix A2):

$$\theta_A = \frac{u}{u + m_J - m_A} \left( 1 + \frac{m_A}{u + m_J - m_A} \cdot \log \left( \frac{m_A}{u + m_J} \right) \right), \quad (2)$$

68 from which we can check that extremely slow (or fast) maturation,  $u \rightarrow 0$  (or  $u \rightarrow +\infty$  respectively), leads to  
 69  $\theta_A \rightarrow 0$  (or 1 respectively. We will omit the degenerated case in which  $u + m_J = m_A$ , as this situation turns  
 70 out to give no reasonable measure for stage-period; Appendix A2). We use  $\theta_A$  as a characteristic parameter of  
 71 the stage-structured host populations.

72 The force of infection for a stage-X host from a stage-Y host (with X and Y running across J and A) in Eqn (1)  
 73 involves with three processes: susceptibility  $\alpha_X$  (the likeliness for which a stage-X host becomes infected, given  
 74 a reception of disease-propagule), contact structure  $\sigma_{XY}$  (which represents the fraction of time a Y-stage host  
 75 spends with a X-stage host), and infectiousness  $\beta_Y$  (the propagule-production from a stage-Y host; see Fig 2):

$$\begin{aligned} \varphi_{JJ} &= \frac{\alpha_J \sigma_{JJ} \beta_J I_J}{H}, \\ \varphi_{JA} &= \frac{\alpha_J \sigma_{JA} \beta_A I_A}{H}, \\ \varphi_{AJ} &= \frac{\alpha_A \sigma_{AJ} \beta_J I_J}{H}, \\ \varphi_{AA} &= \frac{\alpha_A \sigma_{AA} \beta_A I_A}{H}, \end{aligned} \quad (3)$$

76 with  $H = S_J + I_J + S_A + I_A$  the total density of hosts, such that the transmission is frequency-dependent, as is  
 77 assumed in previous studies of stage-structured epidemiological dynamics (e.g., Bernhauerová 2016). Also, to  
 78 link virulence and transmission, we use the trade-off relationship given by  $\beta_J = \frac{b_J k_J v_J}{1 + k_J v_J}$ ,  $\beta_A = \frac{b_A k_A v_A}{1 + k_A v_A}$ , where  $k_X$

79 tunes the efficiency of virulence for infectiousness from stage-X hosts, and  $b_X$  represents the upper bound of  
80 infectiousness from stage-X hosts. Note that we assumed that transmission is a concave function of virulence  
81 to restrict our primary attention to stable evolutionary outcomes (Otto & Day 2007).

82 For quantifying the contact structure, we use a single parameter given by  $\sigma = 1 - \sigma_{AJ} = \sigma_{JJ} = 1 - \sigma_{JA} = \sigma_{AA}$ ,  
83 (Dieckmann *et al.* 2012, Chapter 12). With this symmetry, the measure of assortativity is given by:

$$\rho = \sigma_{JJ} + \sigma_{AA} - 1 = 2\sigma - 1, \quad (4)$$

84 where  $\rho$  varies from  $-1$  to  $1$ . If  $-1 \leq \rho < 0$ , then within-stage contact is less frequent compared to  
85 between-stage contact (such a contact is said to be “disassortative”). Instead, if  $0 < \rho \leq 1$ , then within-stage  
86 contact is more likely than between-stage contact (“assortative” contact).  $\rho = 0$  indicates that contact is  
87 unbiased (“random” contact). In the extreme case,  $\rho = 1$  (or  $-1$ ) indicates that contact occurs exclusively  
88 within the stages (or between the stages, respectively).

89 We use the adaptive dynamics toolbox (Hofbauer & Sigmund 1990; Dieckmann & Law 1996) to study the  
90 long-term evolutionary dynamics of stage-specific virulence. Throughout the paper we assume that parasites  
91 show specific virulence:  $v_J$  and  $v_A$ , with no association or correlation between them (i.e., we study the joint  
92 evolutionary dynamics of  $(v_J, v_A)$ ). First, suppose that the system of ODEs in Eqn (1) has reached a steady  
93 state:  $(S_J, S_A, I_J, I_A) = (S_J^\#, S_A^\#, I_J^\#, I_A^\#)$  for a given (or wild-type) virulence strategy  $\mathbf{v} := (v_J, v_A)$ . We then  
94 introduce a rare mutant  $\mathbf{v}' := (v'_J, v'_A)$  attempting to invade a monomorphic wild-type virulence  $\mathbf{v}$ . We assume  
95 weak selection ( $|\mathbf{v}' - \mathbf{v}|$  is very small). For more details, see Appendix A3.

96 To assess the possibility of mutant invasion, we define the invasion fitness, denoted  $w$ , by using the  
97 Next-Generation Theorem (van den Driessche & Watmough 2002; Hurford *et al.* 2010). The “next-generation

98 matrix” (that determines the long term growth of the mutant) can be written as the product of five matrices:

$$\mathbf{G}' = \underbrace{\begin{pmatrix} S_J^\# & 0 \\ 0 & S_A^\# \end{pmatrix}}_{\text{no. of susceptibles}} \underbrace{\begin{pmatrix} \alpha_J & 0 \\ 0 & \alpha_A \end{pmatrix}}_{\text{susceptibility}} \underbrace{\begin{pmatrix} \sigma_{JJ} & \sigma_{JA} \\ \sigma_{AJ} & \sigma_{AA} \end{pmatrix}}_{\text{contact}} \underbrace{\begin{pmatrix} \frac{\beta'_J}{H^\#} & 0 \\ 0 & \frac{\beta'_A}{H^\#} \end{pmatrix}}_{\text{infectiousness}} \underbrace{\begin{pmatrix} \frac{1}{\mu'_J} & 0 \\ \frac{u}{\mu'_J \mu'_A} & \frac{1}{\mu'_A} \end{pmatrix}}_{\text{infectious period}} \quad (5)$$

99 (see Appendix), where  $H^\# = S_J^\# + S_A^\# + I_J^\# + I_A^\#$  (the total density of the hosts at the endemic equilibrium),  
 100  $\mu'_J = u + m_J + v'_J$  (the reciprocal of the infectious period of juveniles infected by the mutant), and  $\mu'_A =$   
 101  $m_A + v'_A$  (the mortality rate of adults infected by the mutant). Eqn (5) offers a natural interpretation of the  
 102 reproductive success of the mutant by partitioning the epidemiological process, in agreement with models of  
 103 transmission dynamics in heterogeneous host populations (Craft 2015; VanderWaal & Ezenwa 2016; White  
 104 *et al.* 2017). The first matrix represents the availability of susceptible hosts, each with a specific susceptibility  
 105 (the second matrix); the third matrix represents the contact pattern across stages; the fourth matrix represents  
 106 the infectiousness of infected hosts per capita, and the fifth matrix represents the stage-specific infectious  
 107 period with the effect of maturation being included.

108 The invasion fitness is determined by the dominant eigenvalue of  $\mathbf{G}'$  (denoted  $\Lambda[\mathbf{G}']$ ), which turns out to  
 109 exhibit a complicated expression. We therefore use a simpler (but equivalent) measure for the invasion fitness:

$$\begin{aligned} \omega(\mathbf{v}', \mathbf{v}) &= \frac{\alpha_J S_J^\# \sigma_{JJ}}{H^\#} \cdot \frac{\beta'_J}{\mu'_J} + \frac{u}{\mu'_J} \cdot \frac{\alpha_J S_J^\# \sigma_{JA}}{H^\#} \cdot \frac{\beta'_A}{\mu'_A} + \frac{\alpha_A S_A^\# \sigma_{AA}}{H^\#} \cdot \frac{\beta'_A}{\mu'_A} - \rho \frac{\alpha_J S_J^\# \alpha_A S_A^\#}{(H^\#)^2} \cdot \frac{\beta'_J \beta'_A}{\mu'_J \mu'_A} \\ &= q_{JJ}^\# \frac{\beta'_J}{\mu'_J} + \pi'_1 q_{JA}^\# \frac{\beta'_A}{\mu'_A} + q_{AA}^\# \frac{\beta'_A}{\mu'_A} - (q_{JJ}^\# q_{AA}^\# - q_{JA}^\# q_{AJ}^\#) \frac{\beta'_J \beta'_A}{\mu'_J \mu'_A}, \end{aligned} \quad (6)$$

110 with short-hand notation  $\pi'_1 := u/\mu'_J$  (the probability of maturation of juveniles infected by the mutant)  
 111 and  $q_{XY}^\# := \frac{\alpha_X S_X^\# \sigma_{XY}}{H^\#}$  (the availability of X-stage hosts to the parasites infecting a Y-stage host per  
 112 propagule-production). The factor  $\beta'_X/\mu'_X$  represents the total number of propagule produced by a X-stage  
 113 host infected by the mutant. We find that the condition for which the mutant outcompetes the wild type



114  $\omega(\mathbf{v}', \mathbf{v}) > 1$  holds if and only if  $\Lambda[\mathbf{G}'] > 1$ , under weak selection (see Appendix A4).

115 Direction of selection is determined by selection gradient:

$$\begin{aligned} g_J(\mathbf{v}) &:= \left. \frac{\partial w(\mathbf{v}', \mathbf{v})}{\partial v'_J} \right|_{\mathbf{v}'=\mathbf{v}}, \\ g_A(\mathbf{v}) &:= \left. \frac{\partial w(\mathbf{v}', \mathbf{v})}{\partial v'_A} \right|_{\mathbf{v}'=\mathbf{v}}, \end{aligned} \quad (7)$$

116 with the partial derivatives evaluated at  $\mathbf{v}' = \mathbf{v}$  (“neutrality”). Virulence evolves in the direction of selection  
117 gradient until singular strategy (SS) is reached,  $g_J(\mathbf{v}) = g_A(\mathbf{v}) = 0$  at  $\mathbf{v} = \mathbf{v}^*$ . We assess two stability criteria  
118 of SS: the first criterion, attainability (Takada & Kigami 1991; Christiansen 1991), concerns whether SS can  
119 be reached by recurrent small mutations. The second is referred to as evolutionary stability (Maynard Smith  
120 & Price 1973), which assures that SS can resist against any invasion of alternative, mutant strategies. If SS  
121 meets both of these criteria, it is then called as Continuously Stable Strategy (CSS; Eshel 1983). Analytical  
122 investigation revealed that the SS is always a CSS, and thus we do not detail the stability analyses in the main  
123 text (see results).

124 We use the following default parameter-values:  $r = 6$ ,  $\kappa = 0.06$ ,  $m_J = 1$ ,  $\alpha_J = \alpha_A = 1$ ,  $k_J = k_A = 1$ ,  $b_J =$   
125  $b_A = 10$ , while varying  $m_A$ ,  $u$  (thus  $\theta_A$ ) and  $\rho$ . That is, the parameter values are symmetric for juveniles and  
126 adults. We subsequently check the effects of the differences in  $\alpha$  (susceptibility),  $k$  (efficiency of exploitation  
127 for transmission), and  $b$  (upper bound in infectiousness). In addition, we check whether recovery or tolerance  
128 in the host can affect the results. Finally, we examined the outcomes when we assume density-dependent  
129 rather than frequency dependent transmission in the dynamics.

## 130 Results

131 The selection gradient for adult-virulence reads:

$$g_A(\mathbf{v}) \propto \left( \frac{1}{\beta_A} \cdot \frac{d\beta_A}{dv_A} - \frac{1}{\mu_A} \cdot \frac{d\mu_A}{dv_A} \right)^\circ = \left( \frac{1}{\beta_A} \cdot \frac{d\beta_A}{dv_A} - \frac{1}{\mu_A} \right)^\circ \quad (8)$$

132 (where  $^\circ$  represents neutrality,  $\mathbf{v}' = \mathbf{v}$ ; Appendix A5), which is consistent with a number of previous studies:  
 133 under the transmission-virulence trade-off, higher exploitation is expected to increase the infectiousness (i.e.,  
 134 a marginal benefit) at the immediate (marginal) cost owing to a reduced infectious period (Day 2001; Gandon  
 135 *et al.* 2001; Day & Proulx 2004; Gandon 2004; Alizon *et al.* 2009; Cressler *et al.* 2016). This is because the  
 136 reproductive success of parasites infecting adults is, in effect, determined by a single transmission-pathway,  
 137 from adults to any susceptible hosts in the population, regardless of the contact-structure and the stationary  
 138 stage-distribution. Therefore, the direction of selection on adult virulence is completely determined by the  
 139 balance between such marginal benefits and costs, regardless of the characteristics of hosts' stage-structure.

140 In contrast, juvenile-virulence in the model is influenced by additional costs associated with hosts'  
 141 stage-structure. To make the biological meaning clearer, we present the reproductive-value based form of the  
 142 selection gradient (Fisher 1958; Taylor 1990; Caswell 2001; Frank 1998; Grafen 2006; Lion 2018). Reproductive  
 143 values give a proper weightings of fitness effects for age-classes, by taking the contributions of classes to future  
 144 gene-pool into account (Fisher 1958; Taylor 1990; Caswell 2001; Frank 1998; Grafen 2006; Lion 2018). Using  
 145 reproductive values,  $g_J(\mathbf{v})$  reads:

$$g_J(\mathbf{v}) = \overbrace{\left( \underbrace{\ell_J^\circ q_{JJ}^\#}_{\text{juveniles}} + \underbrace{\ell_A^\circ q_{AJ}^\#}_{\text{adults}} \right)}^{\text{transmission from a juvenile to:}} \cdot \frac{\beta_J}{\mu_J} \cdot \underbrace{\left( \frac{1}{\beta_J} \frac{d\beta_J}{dv_J} - \frac{1}{\mu_J} \frac{d\mu_J}{dv_J} \right)}_{\text{marginal benefit/cost}} - \frac{\pi_1^\circ}{\mu_J} \cdot \frac{d\mu_J}{dv_J} \cdot \overbrace{\left( \underbrace{\ell_J^\circ q_{JA}^\#}_{\text{juveniles}} + \underbrace{\ell_A^\circ q_{AA}^\#}_{\text{adults}} \right)}^{\text{transmission from an adult to:}} \cdot \frac{\beta_A}{\mu_A} \quad (9)$$

146 (Appendix A6-8), where  $(\ell_J^\circ, \ell_A^\circ)$  represents the pair of individual reproductive values of the parasites infecting  
147 juvenile and adult hosts (or the left eigenvector of  $\mathbf{G}$  at neutrality; Appendix A6) and the factor  $\ell_J^\circ \times q_{JA}^\#$   
148 for instance represents the reproductive success due to transmission from an adult host to a juvenile  
149 per propagule-production. The first term is multiplied by  $(\ell_J^\circ q_{JJ}^\# + \ell_A^\circ q_{AJ}^\#) (\beta_J/\mu_J)^\circ$ , which represents the  
150 reproductive success of a parasite infecting juveniles, who can receive the marginal benefit due to increased  
151 infectiousness  $(d\beta_J/dv_J)^\circ / \beta_J^\circ$  but pay the marginal cost due to the reduction in infectious periods  $1/\mu_J^\circ$  as  
152 in the selection gradient for adult-virulence (Eqn (8)). In addition, juvenile-virulence incurs the additional  
153 cost of increased mortality of infected juveniles associated with the loss of expected reproductive success  
154 via adult hosts that the parasites could otherwise gain through the maturation of the juvenile hosts, and  
155 thus multiplied by  $(\ell_J^\circ q_{JA}^\# + \ell_A^\circ q_{AA}^\#) (\beta_A/\mu_A)^\circ$  (the reproductive success of a parasite infecting adults) and the  
156 marginal decrease in the probability of maturation  $(\pi_1/\mu_J)^\circ$ . Hence, Eqn (9) clearly captures the selection  
157 forces on juvenile-virulence, including the marginal benefits, marginal costs, and maturation-mediated costs.

158 We investigated the effects of two stage-structure characteristics: (i) post-maturation span  $\theta_A$  and (ii)  
159 stage-assortativity  $\rho$  on the evolutionary outcomes (i.e., CSS; Appendix A9). Strikingly, the CSS for adult-  
160 virulence is necessarily  $v_A^* = \sqrt{m_A/k_A}$  which is independent of any demographic and disease characteristics  
161 of juveniles (as expected from Eqn (8)). Therefore, we used  $v_A^*$  as a reference value in comparison with  $v_J^*$ .

162 In contrast, CSS for juvenile-virulence is dramatically affected by hosts' stage-structure and maturation.  
163 This is because the parasites infecting the juveniles can utilize two transmission-pathways: either from the  
164 juvenile (to any susceptible hosts), or from the adult who has successfully matured from the juvenile stage.  
165 The expression for  $v_J^*$  is analytically intractable, and as such we numerically evaluated  $v_J^*$  by jointly solving  
166 the wild-type ODE Eqn (1) and the selection gradients Eqns (8) and (9).

167 We can immediately see that the evolutionary outcome of adult-virulence increases with adult natural  
168 mortality, in agreement with the previous studies (reviewed in Alizon *et al.* 2009; Cressler *et al.* 2016). To assess  
169 when selection favors higher juvenile-virulence than adult-virulence, we quantified  $v_J^*/v_A^*$  as a function of the

170 assortativity ( $\rho$ , abscissa) and post-maturation span ( $\theta_A$ , ordinate; Fig 3). We found that either disassortative  
171 hosts with a long post-maturation span or assortative hosts with a short post-maturation span select for higher  
172 virulence against juveniles. This result slightly changes given stage-specific mortality rates ( $m_J \neq m_A$ ) such  
173 that a higher mortality for juveniles can bias the outcomes towards higher virulence for juveniles, but the  
174 general trend is robust (Fig 3A-C). Also, the combination of disassortativity and long post-maturation span  
175 (one of the conditions favoring higher virulence against juveniles) leads to parasite extinction as a result of  
176 overexploitation against juveniles (Fig 3B, C; Appendix A10). Note that under these conditions,  $I_J$  is very  
177 small (tending to zero; Fig 3B), while  $S_J$  is not (Fig 3C), meaning that hosts do persist but parasites do not.

178 By relaxing the assumptions of the symmetry in disease-related parameters  $k_J, k_A$  (efficiency of  
179 exploitation for transmission),  $b_J, b_A$  (maximum infectiousness), and  $\alpha_J, \alpha_A$  (susceptibility) for juveniles and  
180 adults, or by incorporating recovery or tolerance, we showed that the results are robust and qualitatively  
181 unchanged (Appendix B). Finally, we checked that density-dependent transmission yields quantitatively  
182 similar results (Appendix B). Therefore, we conclude that the combined effects of maturation and assortativity  
183 are critical to the evolution of virulence.

## 184 Discussion

185 We have shown how parasites may be subject to different selective pressures when they infect adults as  
186 opposed to adults. Our key insight is that the combination between maturation rates and contact-structure  
187 determines the evolutionary outcomes of juvenile-virulence. Higher virulence against juveniles is favored  
188 either if: (i) the adult-stage is relatively long and the contact-structure is disassortative (between age class  
189 interactions are high; Fig 3, left-top zone), or (ii) the juvenile-stage is relatively long and the contact  
190 structure is assortative (interactions occur preferentially within classes; Fig 3, right-bottom zone). These  
191 results can be understood as follows: when the post-maturation span is long and the contact structure is

192 disassortative, adult hosts are abundant in the population and the transmission from juveniles to adults  
193 is more likely than between juveniles; in this case, the availability of adult hosts is higher, which selects  
194 for higher exploitation against juveniles to exploit more abundant resource of adults. Equivalent reasoning  
195 explains higher juvenile-virulence in short maturing and assortative hosts. These considerations mean that  
196 host-demography alongside the maturation of juveniles strongly affects the evolutionary outcomes of parasite  
197 virulence. Spatial and/or temporal segregation in the niches of juveniles and adults therefore has the potential  
198 to drive the evolution of differential virulence. Our novel result is therefore, that virulence is highly sensitive  
199 to stage-structured life-history characteristics of hosts such as ontogeny and any associated, spatio-temporal  
200 niche-shifts.

201 The incorporation of the maturation shows that higher parasite exploitation against juveniles incurs an  
202 additional cost associated with increased maturation failure. In particular, while the marginal value theorem  
203 (Charnov 1976) does correctly predict the evolutionary outcomes of adult virulence it does not predict that of  
204 juvenile virulence. Therefore, sources of heterogeneity in hosts can clearly lead to different predictions than  
205 classic virulence evolution theory based on the marginal value theorem, as claimed in a recent conceptual  
206 review (Lion & Metz 2018). Gandon (2004) and Osnas & Dobson (2011) introduced multiple hosts' types or  
207 species and studied virulence against them. In previous theory, heterogeneity is incorporated on the basis  
208 of hosts species (Regoes *et al.* 2000; Gandon 2004; Osnas & Dobson 2011), vaccination (Gandon *et al.* 2001;  
209 Gandon *et al.* 2003; Yates *et al.* 2006; Zurita-Gutiérrez & Lion 2015), or sex (Úbeda & Jansen 2016) (reviewed in  
210 Lion & Metz 2018). However, none of these studies incorporated stage-structure with associated stage-specific  
211 virulence. Our novel results arise because we explicitly assumed stage-structure with maturation from  
212 juveniles to adults and reproduction by adults rather than more generic heterogeneity between different types  
213 of hosts.

214 Finding examples of stage-specific virulence in empirical systems can be difficult due to the intricacies  
215 of specific host-pathogen systems. Stage-related trends in virulence can be complicated by age-related

216 trends in maternal immunity, adaptive immunity, and exposure rate, and specific host-parasite system  
217 characteristics including maladaptation and immuno-pathogenicity (Hudson & Dobson 1995; Wilson  
218 *et al.* 2002). Additionally, studies looking at age-related virulence or case mortality do not exclusively  
219 look at differences between adult and juvenile stages and may focus on old age-mediated declines in  
220 immuno-competence. However, despite these issues, we found data on several empirical systems that lend  
221 support to our predictions and may offer opportunities for testing our hypotheses (Fig 1). For most of these  
222 systems, we were unable to find data on the assortativity of transmission which therefore limited our ability  
223 to make conclusions about trends in the data. However, both of the two wildlife systems for which we found  
224 data describing all three of our variables ( $v_j^*/v_A^*$ , post-maturation lifespan, and transmission assortativity)  
225 matched our model's predictions. Wanelik *et al.* (2017) showed that Great Island Virus (GIV) transmission in  
226 guillemots (*Uria aalge*) is assortative across age classes because of the spatial structure of breeding grounds.  
227 GIV is transmitted by poorly motile ticks and pre-breeding stages of guillemots do not enter breeding areas  
228 of the colony. As a consequence, the virus does not readily transmit between guillemot age-stages (Wanelik  
229 *et al.* 2017). Previous work on guillemot life-history shows that the birds spend more than three quarters  
230 of their life-span as mature breeders (Harris & Wanless 1995), and therefore the combination of assortative  
231 transmission and fast maturation predicts that GIV should be more virulent in breeders. In line with the  
232 predictions of our model, infection associated mortality risk is 1.45 times higher for adults than for juveniles  
233 (Nunn *et al.* 2006).

234 In the second example, Jones *et al.* (2008) showed that salmon louse caused mortality in juvenile pink  
235 salmon (*Oncorhynchus gorbuscha*), but had no effect on mortality risk for adults. Salmon louse is also  
236 assortatively transmitted between age classes, because pink salmon have strict two-year lifespans where they  
237 are only ever associated with individuals of their same age class (Heard 1991; Krkošek *et al.* 2007). The salmon  
238 only reproduce once at the very end of their lives (semelparity), and therefore have a short adult period. This  
239 short post-maturation stage and assortative transmission correctly predicts the higher salmon louse virulence

240 in juveniles.

241 Better data on mixing matrices for more disease systems could provide interesting insights into the  
242 maintenance of either high juvenile or high adult virulence. One system where these insights could prove  
243 especially important is in Bd (*Batrachochytrium dendrobatidis*, or chytrid fungus) infection in frogs, which  
244 has been causing catastrophic worldwide declines in frog populations (Kilpatrick *et al.* 2010). Bd infection has  
245 been shown to have different virulence effects in the different frog life-stages (Medina *et al.* 2015; Hite *et al.*  
246 2016) and these effects also vary by frog species (Berger *et al.* 1998; Blaustein *et al.* 2005). Recent work has  
247 shown that adult virulence in several frog populations has not decreased even after 20 years of Bd presence  
248 (Voyles *et al.* 2018). Already, frog demography has been implicated as an important factor for population  
249 persistence in the face of Bd with frog species where adults move away from breeding waters being more  
250 resistant to population declines (Lips *et al.* 2006; McCaffery *et al.* 2015), and frogs in habitats with multi-year  
251 larvae having more severe epidemics because the older stages maintain high levels of infection that then spill  
252 over to infect other stages and species (Medina *et al.* 2015; Hite *et al.* 2016). Changes in the assortivity of  
253 mixing clearly has important implications for disease transmission across stages, and our model suggests that  
254 it could also have implications for the maintenance of high virulence in different age stages.

255 While data on age-related contact patterns are difficult to find in wildlife populations, a wealth of mixing  
256 data exists for humans (Mossong *et al.* 2008; Rohani *et al.* 2010). These suggest that contacts relevant for  
257 the transmission of directly transmitted pathogens are highly assortative by age. While the evolutionary  
258 drivers of human pathogens are often complicated, we posit that chickenpox (varicella virus) virulence in  
259 humans proves an intriguing case study. Given that humans have a long juvenile period in the context of our  
260 model, even when we only consider pre-reproductive and reproductive periods (Bogin & Smith 1996), the  
261 higher virulence in adults of chickenpox (23-29 times higher mortality risk in adults (Heininger & Seward  
262 2006) for primary infections in naïve individuals fits the predictions of our model. This higher mortality  
263 risk corresponds to increased viral titers with age (Malavige *et al.* 2008) and, perhaps most interestingly,

264 while varicella virus infects many cell-types, T cell infection is thought to be important for transport and  
265 pathogenesis (Zerboni & Arvin 2016). Therefore, age-related trends in T-cell abundance could be implicated  
266 in chickenpox pathogenesis, although this relationship is complicated by the fact that VSV-specific T-cell  
267 responses are also correlated with decreased viral titer and diminish with age (Erkeller-Yuksel *et al.* 1992;  
268 Nader *et al.* 1995; Malavige *et al.* 2008). Still, this example points towards one mechanism that may underlie  
269 the mediation of age-specific virulence in pathogens.

270 Our models have implications for disease management especially in farmed and other managed animal  
271 populations. For instance, if the post-maturation span is short (i.e. if  $u$  is small), then artificial restriction of  
272 the contacts between stages is predicted to select for higher virulence. However, if the post-maturation span  
273 is long, restricting the contacts into juvenile-juvenile and adult-adult (by e.g., separating the cohorts) can lead  
274 to the parasite extinction as a result of overexploitation against the juveniles. These contrasting outcomes can  
275 occur for any given host species, depending on how management modulates host stage-structure. Our models  
276 thus predict that, to prevent evolutionary changes towards higher virulence, one needs to carefully take into  
277 account the cohort structure.

278 For simplicity and tractability we chose to use simple two-stage models rather than continuous  
279 “infection-age” models (which would entail the formalism based on partial differential equations and dynamic  
280 programming approach). Future studies that capture more continuous age structure are an important next  
281 step. Also, although we assumed that parasites can express conditional virulence depending on the stage of  
282 the hosts they infect with, more data are needed to test this idea. In addition, coevolutionary models and  
283 multiple infections are both likely to give further important insights to the determinants of age-dependent  
284 disease interactions in nature. Our approach offers the basis for modeling these coevolutionary dynamics  
285 between hosts and parasites when there is stage structure.



## 286 References

- 287 Alizon, S. *et al.* (2009). Virulence evolution and the trade-off hypothesis: history, current state of affairs and  
288 the future. *J. Evol. Biol.* **22.2**, pp. 245–259.
- 289 Anderson, R. M. & May, R. (1982). Coevolution of hosts and parasites. *Parasitology* **85.2**, pp. 411–426.
- 290 Anderson, R. M. & May, R. M. (1992). *Infectious diseases of humans: dynamics and control*. Oxford University  
291 Press.
- 292 Ashby, B. & Bruns, E. (2018). The evolution of juvenile susceptibility to infectious disease. *Proc. Roy. Soc. B.*  
293 **285.1881**, p. 20180844.
- 294 Ball, G. H. (1943). Parasitism and evolution. *Am. Nat.* **77.771**, pp. 345–364.
- 295 Berger, L. *et al.* (1998). Chytridiomycosis causes amphibian mortality associated with population declines in  
296 the rain forests of Australia and Central America. *PNAS* **95.15**, pp. 9031–9036.
- 297 Bernhauerová, V. (2016). Vaccine-driven evolution of parasite virulence and immune evasion in  
298 age-structured population: the case of pertussis. *Theor. Ecol.* **9.4**, pp. 431–442.
- 299 Blaustein, A. R. *et al.* (2005). Interspecific variation in susceptibility of frog tadpoles to the pathogenic fungus  
300 *Batrachochytrium dendrobatidis*. *Cons. Biol.* **19.5**, pp. 1460–1468.
- 301 Bogin, B. & Smith, B. H. (1996). Evolution of the human life cycle. *Am. J. Hum. Biol.* **8.6**, pp. 703–716.
- 302 Boots, M. & Sasaki, A. (2003). Parasite evolution and extinctions. *Ecol. Lett.* **6.3**, pp. 176–182.
- 303 Boots, M. *et al.* (2009). The role of ecological feedbacks in the evolution of host defence: what does theory tell  
304 us? *Phil. Trans. Roy. Soc. B* **364.1513**, p. 27.
- 305 Briggs, C. & Godfray, H. (1995). The dynamics of insect-pathogen interactions in stage-structured populations.  
306 *Am. Nat.* **145.6**, pp. 855–887.
- 307 Bull, J. J. & Luring, A. S. (2014). Theory and empiricism in virulence evolution. *PLoS Pathogens* **10.10**,  
308 e1004387.
- 309 Caswell, H. (2001). *Matrix population models*. Wiley Online Library.
- 310 Charnov, E. L. (1976). Optimal foraging, the marginal value theorem. *Theor. Popul. Biol.* **9.2**, pp. 129–136.
- 311 Christiansen, F. B. (1991). On conditions for evolutionary stability for a continuously varying character. *Am.*  
312 *Nat.* Pp. 37–50.
- 313 Cornell, S. J. *et al.* (2008). Seasonality, cohort-dependence and the development of immunity in a natural  
314 host–nematode system. *Proc. Roy. Soc. B* **275.1634**, pp. 511–518.
- 315 Craft, M. E. (2015). Infectious disease transmission and contact networks in wildlife and livestock. *Phil. Trans.*  
316 *Roy. Soc. B.* **370.1669**, p. 20140107.
- 317 Cressler, C. E. *et al.* (2016). The adaptive evolution of virulence: a review of theoretical predictions and  
318 empirical tests. *Parasitology* **143.7**, pp. 915–30.
- 319 Day, T. (2001). Parasite transmission modes and the evolution of virulence. *Evolution* **55.12**, pp. 2389–2400.
- 320 Day, T. & Proulx, S. R. (2004). A general theory for the evolutionary dynamics of virulence. *Am. Nat.* **163.4**,  
321 E40–E63.

- 322 Day, T. *et al.* (2011). Bridging scales in the evolution of infectious disease life histories: theory. *Evolution* **65**.12,  
323 pp. 3448–3461.
- 324 De Castro, F. & Bolker, B. (2005). Mechanisms of disease-induced extinction. *Ecol. Lett.* **8**.1, pp. 117–126.
- 325 Dieckmann, U. (2005). *Adaptive dynamics of infectious diseases: in pursuit of virulence management*. **2**.  
326 Cambridge University Press.
- 327 Dieckmann, U. & Law, R. (1996). The dynamical theory of coevolution: a derivation from stochastic ecological  
328 processes. *J. Math. Biol.* **34**.5-6, pp. 579–612.
- 329 Diekmann, O. *et al.* (2012). *Mathematical tools for understanding infectious disease dynamics*. Princeton  
330 University Press.
- 331 Dwyer, G. (1991). The roles of density, stage, and patchiness in the transmission of an insect virus. *Ecology*  
332 **72**.2, pp. 559–574.
- 333 Ebert, D. & Herre, E. A. (1996). The evolution of parasitic diseases. *Parasitol. Tod.* **12**.3, pp. 96–101.
- 334 Erkeller-Yuksel, F. M. *et al.* (1992). Age-related changes in human blood lymphocyte subpopulations. *J. Pediatr.*  
335 **120**.2, pp. 216–222.
- 336 Eshel, I. (1983). Evolutionary and continuous stability. *J. Theor. Biol.* **103**.1, pp. 99–111.
- 337 Fisher, R. A. (1958). *The genetical theory of natural selection*. Tech. rep. Dover Publications,
- 338 Fleming-Davies, A. E. *et al.* (2015). Effects of host heterogeneity on pathogen diversity and evolution. *Ecol.*  
339 *Lett.* **18**.11, pp. 1252–1261.
- 340 Frank, S. A. (1996). Models of parasite virulence. *Q. Rev. Biol.* Pp. 37–78.
- 341 — (1998). *Foundations of social evolution*. Princeton University Press.
- 342 Gandon, S. *et al.* (2003). Imperfect vaccination: some epidemiological and evolutionary consequences. *Proc.*  
343 *Roy. Soc. B.* **270**.1520, pp. 1129–1136.
- 344 Gandon, S. (2004). Evolution of multihost parasites. *Evolution* **58**.3, pp. 455–469.
- 345 Gandon, S. *et al.* (2001). Host life history and the evolution of parasite virulence. *Evolution* **55**.5, pp. 1056–1062.
- 346 Grafen, A. (2006). A theory of Fisher’s reproductive value. *J. Math. Biol.* **53**.1, pp. 15–60.
- 347 Harris, M. & Wanless, S (1995). Survival and non-breeding of adult Common Guillemots *Uria aalge*. *Ibis* **137**.2,  
348 pp. 192–197.
- 349 Hawlena, H. *et al.* (2006). Ectoparasites and age-dependent survival in a desert rodent. *Oecologia* **148**.1,  
350 pp. 30–39.
- 351 Heard, W. R. (1991). Life history of pink salmon (*Oncorhynchus gorbuscha*). *Pacific salmon life histories*,  
352 pp. 119–230.
- 353 Heininger, U. & Seward, J. F. (2006). Varicella. *The Lancet* **368**.9544, pp. 1365–1376.
- 354 Hite, J. L. *et al.* (2016). Parasites destabilize host populations by shifting stage-structured interactions. *Ecology*  
355 **97**.2, pp. 439–449.
- 356 Hofbauer, J. & Sigmund, K. (1990). Adaptive dynamics and evolutionary stability. *Appl. Math. Lett.* **3**.4,  
357 pp. 75–79.
- 358 Holst, D. von *et al.* (2002). Social rank, fecundity and lifetime reproductive success in wild European rabbits  
359 (*Oryctolagus cuniculus*). *Behav. Ecol. Sociobiol.* **51**.3, pp. 245–254.

- 360 Hudson, P. J. & Dobson, A. P. (1995). “Macroparasites: observed patterns”. *Ecology of Infectious Diseases in*  
361 *Natural Populations*. Ed. by B. T. Grenfell & A. P. Dobson. Cambridge University Press, pp. 144–176.
- 362 Hurford, A. *et al.* (2010). Next-generation tools for evolutionary invasion analyses. *J. Roy. Soc. Int.* **7**.45,  
363 pp. 561–571.
- 364 Jones, O. R. *et al.* (2013). Diversity of ageing across the tree of life. *Nature* **505**.7482, pp. 169–173.
- 365 Jones, S *et al.* (2008). Early development of resistance to the salmon louse, *Lepeophtheirus salmonis* (Krøyer),  
366 in juvenile pink salmon, *Oncorhynchus gorbuscha* (Walbaum). *J. Fish Diseases*. **31**.8, pp. 591–600.
- 367 Kilpatrick, A. M. *et al.* (2010). The ecology and impact of chytridiomycosis: an emerging disease of amphibians.  
368 *TREE* **25**.2, pp. 109–118.
- 369 Krkošek, M. *et al.* (2007). Effects of host migration, diversity and aquaculture on sea lice threats to Pacific  
370 salmon populations. *Proc. Roy. Soc. B* **274**.1629, pp. 3141–3149.
- 371 Lack, D. L. (1968). Ecological adaptations for breeding in birds.
- 372 Lion, S. (2018). Class structure, demography, and selection: reproductive-value weighting in nonequilibrium,  
373 polymorphic populations. *Am. Nat.* **191**.5, pp. 620–637.
- 374 Lion, S. & Metz, J. A. J. (2018). Beyond  $R_0$  maximisation: on pathogen evolution and environmental  
375 dimensions. *TREE* **33**, pp. 75–90.
- 376 Lips, K. R. *et al.* (2006). Emerging infectious disease and the loss of biodiversity in a Neotropical amphibian  
377 community. *PNAS* **103**.9, pp. 3165–3170.
- 378 Lynsdale, C. L. *et al.* (2017). Parasite-associated mortality in a long-lived mammal: Variation with host age,  
379 sex, and reproduction. *Ecol. Evol.* **7**.24, pp. 10904–10915.
- 380 Malavige, G. N. *et al.* (2008). Viral load, clinical disease severity and cellular immune responses in primary  
381 varicella zoster virus infection in Sri Lanka. *PloS one* **3**.11, e3789.
- 382 Maynard Smith, J. & Price, G. R. (1973). The Logic of Animal Conflict. *Nature* **246**, p. 15.
- 383 McCaffery, R. *et al.* (2015). The demography of *Atelopus decline*: Harlequin frog survival and abundance in  
384 central Panama prior to and during a disease outbreak. *Glob. Ecol. Cons.* **4**, pp. 232–242.
- 385 Medina, D. *et al.* (2015). Delayed metamorphosis of amphibian larvae facilitates *Batrachochytrium*  
386 *dendrobatidis* transmission and persistence. *Diseases of Aquatic Organisms* **117**.2, pp. 85–92.
- 387 Mideo, N. *et al.* (2011). Bridging scales in the evolution of infectious disease life histories: application.  
388 *Evolution* **65**.11, pp. 3298–3310.
- 389 Morisse, J. *et al.* (1991). Hepatitis of viral origin in Leporidae: introduction and aetiological hypotheses. *Revue*  
390 *scientifique et technique (International Office of Epizootics)* **10**.2, pp. 269–310.
- 391 Mossong, J. *et al.* (2008). Social contacts and mixing patterns relevant to the spread of infectious diseases. *PLoS*  
392 *Medicine* **5**.3, e74.
- 393 Nader, S. *et al.* (1995). Age-related differences in cell-mediated immunity to varicella-zoster virus among  
394 children and adults immunized with live attenuated varicella vaccine. *J. Infect. Diseases*. **171**.1, pp. 13–17.
- 395 Nunn, M. *et al.* (2006). Tick-borne Great Island Virus:(II) Impact of age-related acquired immunity on  
396 transmission in a natural seabird host. *Parasitology* **132**.2, pp. 241–253.

- 397 Osnas, E. E. & Dobson, A. P. (2011). Evolution of virulence in heterogeneous host communities under multiple  
398 trade-offs. *Evolution* **66.2**, pp. 391–401.
- 399 Otto, S. P. & Day, T. (2007). *A biologist's guide to mathematical modeling in ecology and evolution*. **13**. Princeton  
400 University Press.
- 401 Read, A. F. (1994). The evolution of virulence. *Tr. Microbiol.* **2.3**, pp. 73–76.
- 402 Regoes, R. R. *et al.* (2000). Evolution of virulence in a heterogeneous host population. *Evolution* **54.1**, pp. 64–71.
- 403 Reluga, T. C. *et al.* (2007). Optimal timing of disease transmission in an age-structured population. *Bull. Math.*  
404 *Biol.* **69.8**, pp. 2711–2722.
- 405 Rohani, P. *et al.* (2010). Contact network structure explains the changing epidemiology of pertussis. *Science*  
406 **330.6006**, pp. 982–985.
- 407 de Roos, A. M. & Persson, L. (2013). *Population and community ecology of ontogenetic development*. Princeton  
408 University Press.
- 409 Schmid-Hempel, P. (2011). *Evolutionary parasitology: the integrated study of infections, immunology, ecology,*  
410 *and genetics*. Oxford University Press, New York.
- 411 Smith, T. (1904). Some problems in the life history of pathogenic microorganisms. *Science* **20.520**, pp. 817–832.
- 412 Sol, D. *et al.* (2003). Parasite mediated mortality and host immune response explain age-related differences in  
413 blood parasitism in birds. *Oecologia* **135.4**, pp. 542–547.
- 414 Sukumar, R. *et al.* (1997). Demography of captive Asian elephants (*Elephas maximus*) in southern India. *Zoo*  
415 *Biology: Published in affiliation with the American Zoo and Aquarium Association* **16.3**, pp. 263–272.
- 416 Takada, T. & Kigami, J. (1991). The dynamical attainability of ESS in evolutionary games. *J. Math. Biol.* **29.6**,  
417 pp. 513–529.
- 418 Taylor, P. D. (1990). Allele-frequency change in a class-structured population. *Am. Nat.* **135**, pp. 95–106.
- 419 Úbeda, F. & Jansen, V. A. A. (2016). The evolution of sex-specific virulence in infectious diseases. *Nat. Comm.*  
420 **7**, p. 13849.
- 421 van den Driessche, P. & Watmough, J. (2002). Reproduction numbers and sub-threshold endemic equilibria  
422 for compartmental models of disease transmission. *Math. Biosci.* **180.1**, pp. 29–48.
- 423 VanderWaal, K. L. & Ezenwa, V. O. (2016). Heterogeneity in pathogen transmission: mechanisms and  
424 methodology. *Funct. Ecol.* **30.10**. Ed. by D. Hawley, pp. 1606–1622.
- 425 Voyles, J. *et al.* (2018). Shifts in disease dynamics in a tropical amphibian assemblage are not due to pathogen  
426 attenuation. *Science* **359.6383**, pp. 1517–1519.
- 427 Wanelik, K. M. *et al.* (2017). Investigating the effects of age-related spatial structuring on the transmission of  
428 a tick-borne virus in a colonially breeding host. *Ecol. Evol.* **7.24**, pp. 10930–10940.
- 429 Wassif, K. & Soliman, S. (1980). “Population studies on gerbils of the western desert of Egypt, with special  
430 reference to *Gerbillus andersoni de Winton*”. *Proceedings of the 9th Vertebrate Pest Conference (1980)*, p. 41.
- 431 White, L. A. *et al.* (2017). Using contact networks to explore mechanisms of parasite transmission in wildlife.  
432 *Biol. Rev.* **92.1**, pp. 389–409.
- 433 Williams, P. D. (2011). New insights into virulence evolution in multigroup hosts. *Am. Nat.* **179.2**, pp. 228–239.

- 434 Williams, P. D. & Kamel, S. J. (2018). The evolution of pathogen virulence: Effects of transitions between host  
435 types. *J. Theor. Biol.* **438**, pp. 1–8.
- 436 Wilson, K. *et al.* (2002). Heterogeneities in macroparasite infections: patterns and processes. *The Ecology of*  
437 *Wildlife Diseases* **44**, pp. 6–44.
- 438 Yates, A. *et al.* (2006). How do pathogen evolution and host heterogeneity interact in disease emergence? *Proc.*  
439 *Roy. Soc. B.* **273**.1605, pp. 3075–3083.
- 440 Zerboni, L. & Arvin, A. M. (2016). “The pathogenesis of varicella-zoster virus neurotropism and infection”.  
441 *Neurotropic viral infections*. Springer, pp. 135–173.
- 442 Zurita-Gutiérrez, Y. H. & Lion, S. (2015). Spatial structure, host heterogeneity and parasite virulence:  
443 implications for vaccine-driven evolution. *Ecol. Lett.* **18**.8, pp. 779–789.

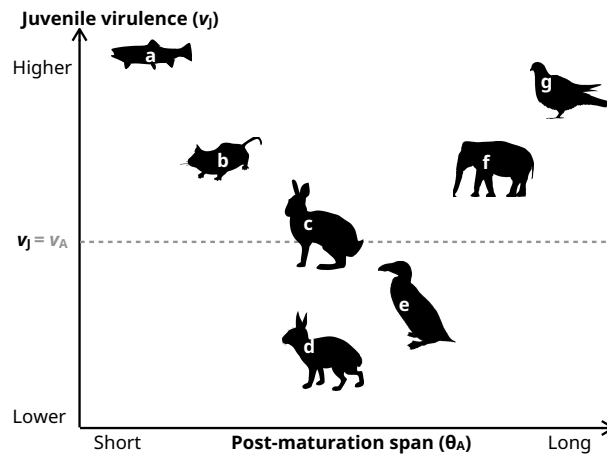

Figure 1: A graphical representation of the empirical data on stage-specific virulence. In the following, H indicates “host” while P indicates “parasites”: (a) H: Pink Salmon (*Oncorhynchus gorbuscha*); P: Salmon Louse (Heard 1991; Jones *et al.* 2008). (b) H: Gerbil (*Gerbillus andersoni*); P: Ectoparasites (Wassif & Soliman 1980; Hawlena *et al.* 2006). (c) H: European Rabbit (*Oryctolagus cuniculus*); P: Nematode (Holst *et al.* 2002; Cornell *et al.* 2008). (d) H: Rabbits (*Leporidae*); P: RHD Virus (Morisse *et al.* 1991; Reluga *et al.* 2007). (e) H: Common Guillemot (*Uria aalge*); P: Great Island Virus (Harris & Wanless 1995; Nunn *et al.* 2006; Wanelik *et al.* 2017). (f) H: Asian Elephant (*Elephas maximus*); P: Parasites (Sukumar *et al.* 1997; Lynsdale *et al.* 2017). (g) H: Pigeon (*Columba livia*) P: Blood parasites (Lack 1968; Sol *et al.* 2003)

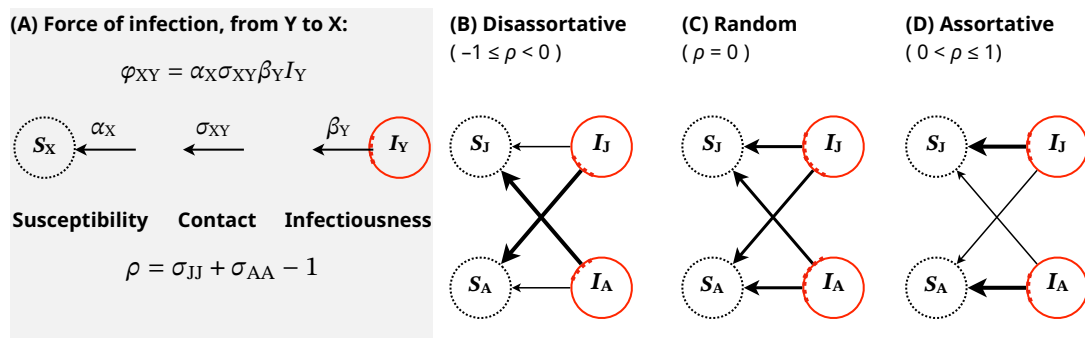

Figure 2: A schematic illustration of the model on the force of infection and assortativity. (A) Force of infection from Y to X,  $\varphi_{XY}$ , is a compound factor of susceptibility (likeliness of X-hosts becoming infected), contact intensity (likeliness of contacts between X and Y), and infectiousness (propagule production of the parasite carried by Y). (B-D) Degrees of assortativity. Negative assortativity indicates that contacts occur more frequently between stages than within stages (panel B). The contact structure is unbiased (random) when  $\rho = 0$  (panel C). Positive assortativity indicates that contacts occur more frequently within stages than between stages (panel D).

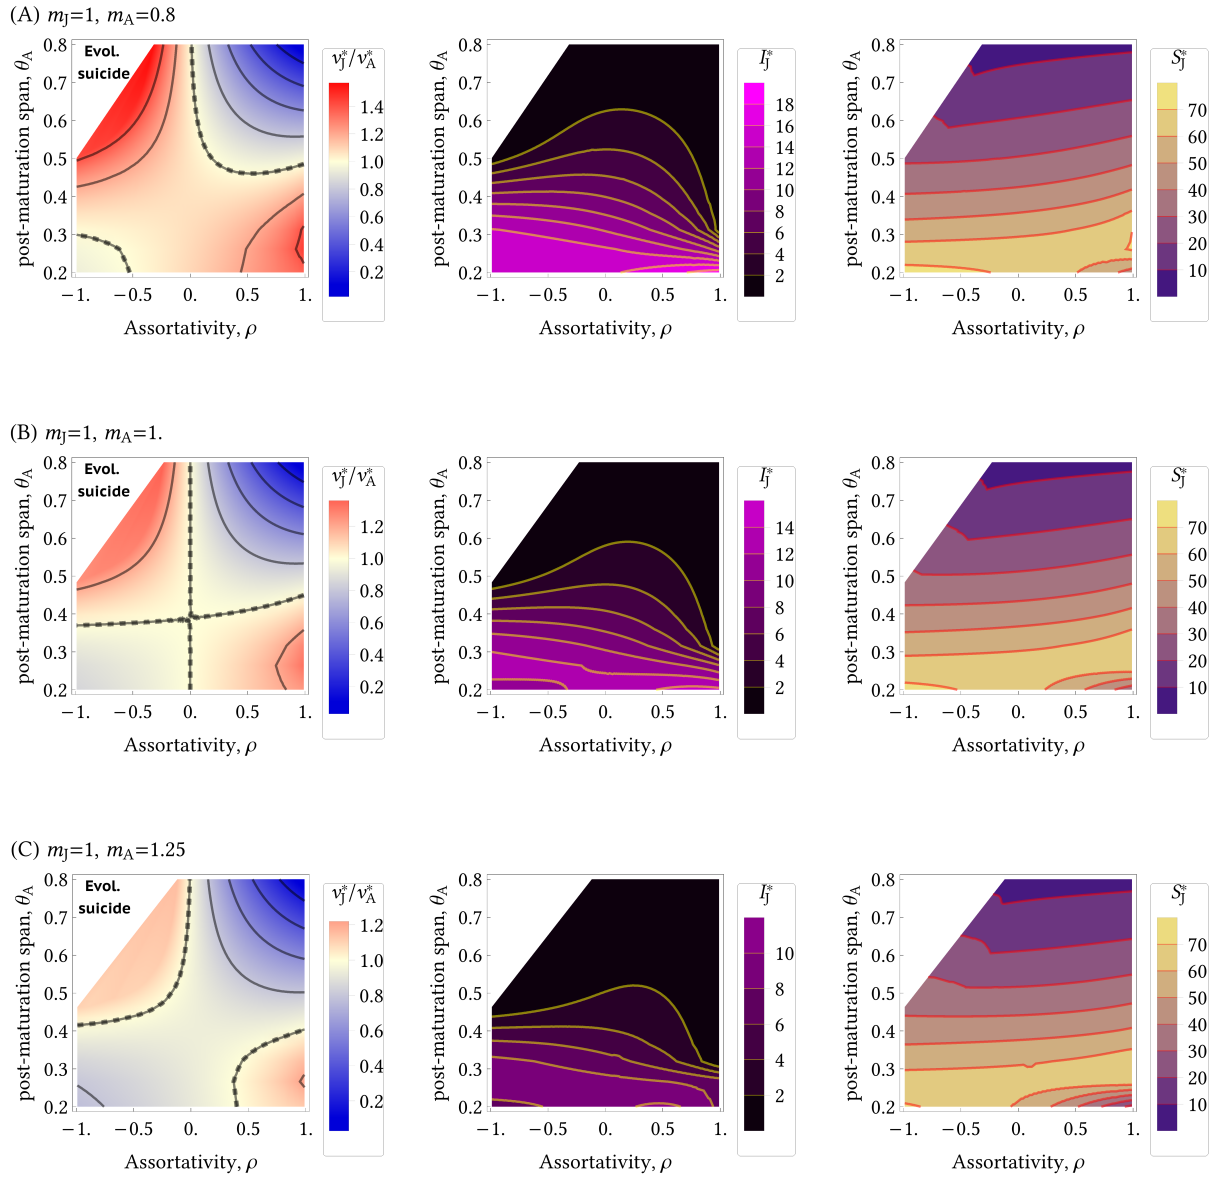

Figure 3: Left panels: Evolutionary outcomes of relative virulence ( $v_J^*/v_A^*$ ), in which red color indicates  $v_J^* > v_A^*$  and blue color indicates  $v_J^* < v_A^*$ . Color scales used are the same in the three panels. Middle panels: Densities of infected juveniles at equilibrium,  $I_J^*$ . Right panels: Densities of susceptible juveniles at equilibrium,  $S_J^*$ . In each panel, abscissa: assortativity; ordinate: post-maturation span  $\theta_A$ ; from (A) to (C):  $m_A = 0.8, 1.0, 1.25$  as indicated; White zone: evolutionary suicide; dotted curve:  $v_J^* = v_A^*$  (equal virulence); parameters: default values. We numerically evaluated CSS-virulence and densities of infected juveniles and adults.
